# A RID-like cytosine methyltransferase homologue controls sexual development in the fungus

*Podospora anserina*

Grognet P<sup>1¶</sup>, Timpano H<sup>2¶</sup>, Carlier F<sup>1</sup>, Aït-Benkhali J<sup>2</sup>, Berteaux-Lecellier V<sup>3</sup>, Debuchy R<sup>1</sup>,  
Bidard F<sup>2, #</sup> and Malagnac F<sup>1\*</sup>

<sup>1</sup> Institute for Integrative Biology of the Cell (I2BC), CEA, CNRS, Univ. Paris-Sud, Université  
Paris-Saclay, 91198, Gif-sur-Yvette cedex, France

<sup>2</sup> Université Paris-Sud, Institut de Génétique et Microbiologie UMR8621, Orsay, France,  
CNRS, Institut de Génétique et Microbiologie UMR8621, Orsay, France

<sup>3</sup> UMR9220 Ecologie Marine Tropicale dans les Océans Pacifique et Indien, Institut  
d'Ecologie et Environnement, Noumea, France

<sup>#</sup> Present address : Biotechnology Department, IFP Energies Nouvelles, Rueil-Malmaison,  
France

<sup>¶</sup> Contributed equally

Key words: Cytosine Methyltransferase, sexual development, *Podospora anserina*

\* corresponding author: fabienne.malagnac@u-psud.fr

## Abstract

DNA methyltransferases are ubiquitous enzymes conserved in bacteria, plants and opisthokonta. These enzymes, which methylate cytosines, are involved in numerous biological processes, notably development. In mammals and higher plants, methylation patterns established and maintained by the cytosine DNA methyltransferases (DMTs) are essential to zygotic development. In fungi, some members of an extensively conserved fungal-specific DNA methyltransferase class are both mediators of the Repeat Induced Point mutation (RIP) genome defense system and key players of sexual reproduction. Yet, no DNA methyltransferase activity of these purified RID (RIP deficient) proteins could be detected *in vitro*. These observations led us to explore how RID-like DNA methyltransferase encoding genes would play a role during sexual development of fungi showing very little genomic DNA methylation, if any.

To do so, we used the model ascomycete fungus *P. anserina*. We identified the *PaRid* gene, encoding a RID-like DNA methyltransferase and constructed knocked-out  $\Delta PaRid$  defective mutants. Crosses involving *P. anserina*  $\Delta PaRid$  mutants are sterile. Our results show that, although gametes are readily formed and fertilization occurs in a  $\Delta PaRid$  background, sexual development is blocked just before the individualization of the dikaryotic cells leading to meiocytes. Complementation of  $\Delta PaRid$  mutants with ectopic alleles of *PaRid*, including GFP-tagged, point-mutated, inter-specific and chimeric alleles, demonstrated that the catalytic motif of the putative PaRid methyltransferase is essential to ensure proper sexual development and that the expression of PaRid is spatially and temporally restricted. A transcriptomic analysis performed on mutant crosses revealed an overlap of the PaRid-controlled genetic network with the well-known mating-types gene developmental pathway common to an important group of fungi, the Pezizomycotina.

## Author Summary

Sexual reproduction is considered to be essential for long-term persistence of eukaryotic species. Sexual reproduction is controlled by strict mechanisms governing which haploids can fuse (mating) and which developmental paths the resulting zygote will follow. In mammals, differential genomic DNA methylation patterns of parental gametes, known as ‘DNA methylation imprints’ are essential to zygotic development, while in plants, global genomic demethylation often results in female-sterility. Although animal and fungi are evolutionary related, little is known about epigenetic regulation of gene expression and development in multicellular fungi. Here, we report on a gene of the model fungus *Podospira anserina*, encoding a protein called PaRid that looks like a DNA methyltransferase. We showed that expression of the catalytically functional version of the PaRid protein is required in the maternal parental strain to form zygotes. By establishing the transcriptional profile of *PaRid* mutant strain, we identified a set of PaRid direct and/or indirect target genes. Half of them are also targets of a mating-type transcription factor known to be a major regulator of sexual development. So far, there was no other example of identified RID targets shared with a well-known developmental pathway that is common to an important group of fungi, the Pezizomycotina

## Introduction

A covalently modified DNA base, the 5-methylcytosine (5-meC) is common in genomes of organisms as diverse as bacteria, fungi, plants and animals. In eukaryotes, when present, this epigenetic modification is associated with down-regulation of gene expression and suppression of transposon activity. Patterns of cytosine methylation are established and maintained through subsequent DNA replication cycles by the cytosine DNA methyltransferases (DMTs), a class of enzymes conserved from bacteria to mammals. Five families of eukaryotic DMTs can be distinguished [1,2]: 1) the “maintenance” DMT family

which includes the mammalian DNMT1 [3], the plant MET1 [4] and the fungal DIM-2 enzymes [5]; 2) the “*de novo*” DMT family which includes the mammalian DNMT3A and DNMT3B [6] and the plant Domains Rearranged Methyltransferase DRM2 [7]; 3) the flowering plant-specific “maintenance” chromomethylase (CMT) family, which includes the *Arabidopsis thaliana* CMT2 and CMT3 enzymes [8–10]; 4) the fungal-specific DMT-like family which includes the *Ascobolus immersus* Masc1 [11] and the *Neurospora crassa* RID proteins [12]; 5) the putative CG-specific “maintenance” DMTs of the structurally divergent DNMT5 family [13,14]. DMTs from the first three families have been shown to methylate cytosines *in vitro*, while no such activity has ever been demonstrated either for the fungal DMT-like protein [11,12] nor for the DMTs of the DNMT5 family [13]. A sixth family, typified by Dnmt2 which is now known to be a tRNA methyltransferase, was therefore discarded from the *bona fide* DMT group [15]. Surprisingly, genes encoding putative DMTs can also be found in genome of species actually having very few, if any, 5-meC (e.g., *Dictyostelium discoideum* [16], *Drosophila melanogaster* [17] and *Aspergillus nidulans* [18]). These DMT-like proteins might be endowed with a still undetermined function. By contrast, most of the ascomycetous yeasts, including the model organism *Saccharomyces cerevisiae* and the human pathogen *Candida albicans*, lack genes encoding putative DMT-like enzymes. A notable exception includes the fission yeast *Schizosaccharomyces pombe* genome that contains a *Dnmt2*-like homolog. To date, the presence of 5-mC in the ascomycetous yeast genomes remains controversial [19,20].

In mammals and higher plants, methylation of cytosines is mostly associated with stable and inheritable repression of gene transcription. Therefore, it plays an essential role in genome stability and developmental programs such as imprinting and X chromosome inactivation [21]. In mice, loss of function of DNMT1 results in embryonic lethality [22] whereas flowering plants that present mutation in MET1, display a spectrum of viable developmental abnormalities [23,24]. In fungi, however, alteration of 5-meC content results in more contrasted outcomes. In the model ascomycete *N. crassa* inactivation of the *dim-2*

gene, which encodes an enzyme from the “maintenance” DMT family results in complete loss of DNA methylation. Remarkably, the *dim-2* mutants behave as wild-type strains with respect to their vegetative life cycle and their sexual reproduction cycle [5]. These observations indicate that although *N. crassa* displays substantial cytosine methylation in some genomic compartments, this epigenetic modification is dispensable for all developmental processes observed in laboratory conditions. RID (for RIP Deficient), the second putative DMT of *N. crassa* belongs to the fungal-specific DMT-like family. The RID protein plays an essential role in RIP (Repeat-Induced point mutation), a genome defense mechanism conserved among Pezizomycotina fungi [12,25,26]. As defined in *N. crassa* by Selker and colleagues, RIP occurs in haploid parental nuclei after fertilization but before karyogamy. Repetitive DNA sequences originally described as longer than 400 bp, are detected during the RIP process and are subsequently subjected to extensive conversion of cytosine to thymidine (C-to-T) [27,28]. Over the extent of the RIP targeted repeats, the remaining cytosines are heavily methylated. Furthermore, in *N. crassa*, recent findings showed that linker regions located in between RIPed repeats are subjected to RID-independent RIP [29]. This cytosine to thymine mutagenic process is mediated by DIM-2 and relies on heterochromatin-related pathway. In this fungus, the absence of RID abolishes RIP on newly formed repeats without causing additional defect, such mutants displaying wild-type vegetative growth and sexual cycle.

The analogous MIP (Methylation Induced Premeiotically) process discovered in *A. immersus* leads to cytosine methylation only, within repeats [30]. Disruption of *Masc1*, which encodes a member of the fungal-specific DMT-like family, results in abolition of the *de novo* methylation of repeats but also in severely impaired sexual development [11]. Indeed, when *Masc1* is absent in both parental stains, the resulting crosses are arrested at an early stage of sexual reproduction and no dikaryotic cells formed. Similar defects of sexual development have been observed when RID-like *DmtA* and *TrRid* knockout mutants were constructed in *A. nidulans* [18] and *Trichoderma reesei* [31], respectively (Wan-Chen Li and Ting-Fang Wang, personal communication). This suggests that, unlike RID of *N. crassa*, several

members of the fungal-specific DMT-like family could be involved in both genome defense and development [32], as for Masc1, which appears as the founding prototype of this family of putative DMTs.

Unlike *A. nidulans* and *T. reesei*, the model ascomycete, *P. anserina* do not produce asexual conidia and therefore relies only on sexual reproduction to propagate, before the colony dies of senescence. Besides, this fungus displays an active RIP process prior to the formation of the zygotes, but the RIPed targets are not methylated [33,34]. In this context, we explored the function of PaRid, a DMT homologue closely related to the *N. crassa* RID protein. In the present study, we showed that the PaRid fungal-specific DMT-like protein is essential to ensure proper sexual development, while the catalytically dead version of this protein could not. Moreover, we demonstrated that PaRid is required in the maternal parental strain. Indeed, in the absence of PaRid, even if the wild-type allele is present in the nuclei coming from the male gamete, the sexual development is blocked before the dikaryon formation. By establishing the transcriptional profile of mutant crosses, we also identified a set of PaRid direct and/or indirect target genes. A substantial subset of these genes was previously identified as targets of FPR1, a mating-type transcription factor known to be a major regulator of fertilization and subsequent sexual development.

# Results

## PaRid is essential to ensure proper sexual development

The *P. anserina* genome contains a single gene, namely *PaRid* (Pa\_1\_19440) [35], which encodes a 752 amino acid protein closely related to fungal-specific DMT-like proteins (Fig 1A). In addition of conserved DMT domain motifs (I to X) and expected Target Recognition Domain variable region (TRD), *PaRid* shows typical signatures of cytosine methyltransferases (PF00145, PS51679, PR00105) (Fig 1B). This protein belongs to the same phylogenetic group (DMT-like fungal-specific family) as the previously described *N. crassa* RID protein (41% identity) [18], *A. immersus* Masc1 protein (33% identity) [11] and *A. nidulans* DmtA (31% identity) (Fig 1C). As already pointed out for Masc1/Rid DMT-like, these proteins, including *PaRid*, have peculiar features [32]. They show a non-canonical EQT (glutamate-glutamine-threonine) triad in motif VI instead of the ENV (glutamate-asparagine-valine) triad shared by all other eukaryotic C5-cytosine methyltransferases (Fig 1D) as well as a remarkably short TRD domain (80 amino acids).

An EST database generated from vegetatively grown *P. anserina* showed no expression of *PaRid*. However, the *PaRid* expression profile extracted from a microarray transcriptional time-course analysis performed during *P. anserina*'s sexual development (Bidard and Berteaux-Lecellier, GEO accession no. GSE104632) showed a peak at T12 (12 hours post fertilization) followed by a decrease at T30 (30 hours post fertilization) (S1A Fig). Besides RT-PCR experiments (S1B Fig) indicated that *PaRid* transcripts could be detected up to T96 (96 hours post fertilization). Searching the available *P. anserina* RNA-seq data [36], we did not find any evidence of non-coding RNA at the *PaRid* locus (S1C Fig), as described for sense-antisense DmtA/tmdA transcripts found in *A. nidulans* [18].

To gain insight about a potential function of *PaRid* during the life cycle of *P. anserina*, we deleted the corresponding gene. Replacement of the *PaRid* wild-type allele with the hygromycin-B resistance marker generated the  $\Delta PaRid$  null allele (*PaRid::hph*) (Materials

and methods and S2 Fig). The  $\Delta PaRid$  mutant strains displayed wild-type phenotypes with respect to vegetative growth and vegetative developmental programs (i.e. germination, mycelium pigmentation, aerial hyphae production, branching, anastomosis, longevity, stress resistance, See S2 Table, S4 and S5 Figs), indicating that the *PaRid* gene is dispensable for the vegetative phase of *P. anserina*'s life cycle.

We then investigated the ability of the  $\Delta PaRid$  mutant strains to perform sexual reproduction (see S3 Fig for description). During the first 30 hours post-fertilization, the sexual development of homozygous  $\Delta PaRid$  crosses is indistinguishable from that of wild-type crosses. In homozygous  $\Delta PaRid$  crosses, the fruiting bodies are formed normally, both in timing (24 hours post-fertilization) and in number (4333 in average per cross  $\pm$  368, N=5), as compared to homozygous wild-type crosses (4477 in average per cross  $\pm$  458, N=5) (S3 Table, Fig 2A). However, while the fructifications originating from homologous wild-type crosses continued to develop up to 45 hours post-fertilization, those originating from homozygous  $\Delta PaRid$  crosses stopped maturing around 30 hours after fertilization, forming distinctive micro-perithecia only. Although these micro-perithecia never grew into fully mature fruiting bodies, they displayed no visible morphological defects (Fig 2B). Importantly, they were fully pigmented and harbored typical necks and ostioles. As a consequence of this early developmental arrest, while one fully matured perithecium would produce hundreds of asci after 96 hours post fertilization, the  $\Delta PaRid$  micro-perithecia are barren (Fig 2C).

Furthermore, heterozygous orientated crosses showed that when the wild-type *PaRid* allele was present in the female gamete genome (i.e. ascogonia) and the  $\Delta PaRid$  null allele was present in the male gamete genome (i.e. spermatia), the fruiting-body development was complete and resulted in the production of asci with ascospores (S6B Fig). The progeny isolated from this cross showed the expected 1:1 segregation of the  $\Delta PaRid$  allele. On the contrary, when the  $\Delta PaRid$  null allele was present in the female gamete genome and the wild-type *PaRid* allele was present in the male gamete genome, the fruiting body development was blocked and the resulting micro-perithecia are barren (S6B Fig).



Altogether, these results indicate that (1)  $\Delta PaRid$  mutants formed both male and female gametes and that these gametes are able to fuse since (2) fertilization occurred as efficiently in homozygous  $\Delta PaRid$  mutant crosses than in wild-type crosses, yielding a similar number of fruiting bodies per crosses (3) the wild-type *PaRid* allele must be present in the maternal haploid genome for completion of sexual development. Notably, because reciprocal heterozygous orientated crosses with *mat*<sup>-</sup> and *mat*<sup>+</sup> wild-type strains behaved similarly, the observed  $\Delta PaRid$  phenotype was not mating-type dependent.

### **PaRid does not contribute to the development of maternal tissues**

Fruiting bodies in Pezizomycotina are integrated structure made of two major kinds of tissues. The outer part, also called envelope or peridium, is exclusively made of maternal tissue whereas the inner part, the zygotic tissue is issued from fusion of the two parental haploid gametes [37]. To check whether the  $\Delta PaRid$  sterility resulted from a peridium defect or from a developmental defect of the zygotic tissue, we set up trikaryon crosses involving the  $\Delta mat$  strain [38,39]. Because the  $\Delta mat$  strain lacks the genes required for fertilization, it does not participate either as male or female in sexual reproduction. However, the  $\Delta mat$  mycelium is able to provide maternal hyphae required to build fruiting bodies. Consequently, the  $\Delta mat$  strain can only complement mutants defective for the formation of the envelope but cannot complement zygotic tissue dysfunction. We observed that the  $\Delta mat$  ; *mat*<sup>+</sup>  $\Delta PaRid$ ; *mat*<sup>-</sup>  $\Delta PaRid$  trikaryons yielded micro-perithecia only (S6C Fig), equivalent in size and shape to the micro-perithecia generated by the *mat*<sup>+</sup>  $\Delta PaRid$  ; *mat*<sup>-</sup>  $\Delta PaRid$  dikaryons. These results indicated a defect of zygotic tissues in  $\Delta PaRid$  mutants. Furthermore, grafting  $\Delta PaRid$  micro-perithecia onto a wild-type mycelium did not result in further development of the fruiting bodies and did not restore ascus production either (S4 Table), which disproves the hypothesis of a metabolic deficiency or a nutrient shortage being the cause of the observed  $\Delta PaRid$  mutant strain defects [40]. Conversely, early stage (not yet mature) wild-type perithecia grafted onto  $\Delta PaRid$  mycelia, continued to develop into fully mature perithecia and

expelled the usual amount of ascospores confirming that the  $\Delta PaRid$  mutant mycelium is able to provide all required nutrients.

# **In the absence of PaRid in female gametes, sexual development is blocked before the dikaryon formation**

As mentioned above, in *P. anserina*, fertilization results in formation of a plurinucleate ascogonium located inside the fruiting bodies. This ascogonium gives rise to dikaryotic cells that differentiate specialized cells (croziers) in which karyogamy leads to the formation of zygotes (S3 Fig). The diploid cells immediately enter meiosis to yield ascospores. In the homozygous  $\Delta PaRid$  crosses, dissection of micro-perithecia contents (N=5) performed 48 hours post-fertilization showed plurinucleate ascogonial cells, but an absence of dikaryotic cells. This observation indicated that the sexual development was blocked before the formation of the dikaryotic cells (Fig 2D). Control experiment performed in the same conditions on perithecia contents collected from homozygous wild-type crosses (N=5), typically showed 20 to 30 dikaryotic cells per perithecia (Fig 2D). As mentioned above, heterozygous crosses where the  $\Delta PaRid$  null allele was present in the female gamete genome and the wild-type *PaRid* allele in the male gamete genome resulted in the formation of micro-perithecia. When their content was dissected (N=5), no dikaryotic cells were observed as in the homozygous  $\Delta PaRid$  crosses. By contrast, heterozygous crosses where the wild-type *PaRid* allele was present in the female gamete genome and the  $\Delta PaRid$  null allele in the male gamete genome resulted in the formation of fully mature perithecia that contain dikaryotic cells (N=5). Altogether, these results show that a wild-type *PaRid* allele must be present in the haploid genome of *P. anserina*'s female gametes but not in the haploid genome of *P. anserina*'s male gametes for the dikaryotic cells to form.

Nevertheless, when homozygous  $\Delta PaRid$  crosses are incubated from three to four weeks in the culture room (as opposed to the 96 hours post-fertilization needed for wild-type crosses to yield offspring), few asci were produced. A total of three asci were collected from

20 independent homozygous  $\Delta PaRid$  crosses showing micro-perithecia only, whereas tens of thousands can typically be recovered from a single wild-type cross. Each of these 12  $\Delta PaRid$  dikaryotic ascospores displayed wild-type shape, germinated efficiently and generated *bona fide*  $\Delta PaRid$  mutant strains.

## Complementation of the $\Delta PaRid$ mutants with ectopic alleles

To verify that the *PaRid* deletion was responsible for the sexual development arrest when absent from the female gamete haploid genome, we transformed a  $\Delta PaRid$  strain with a *PaRid-HA* allele (see Material and Method section). Among the phleomycin-resistant transformants that were recovered (N=109), 84% showed a complete restoration of fertility (Table 1). Moreover, when the expression of *PaRid* was driven by the highly and constitutively active *AS4* promoter (*AS4-PaRid-HA* allele) [41], 67% of the phleomycin-resistant transformants (N=78) completed sexual development and produced ascospores (Table 1). Among these complemented transformants, no noticeable additional vegetative or reproductive phenotypes were observed (S4 Fig).

**Table 1. Complementation experiments.**

| Alleles                                       | Fertile | Sterile |
|-----------------------------------------------|---------|---------|
| <i>PaRid-HA</i>                               | 92      | 17      |
| <i>PaRid-GFP-HA</i>                           | 20      | 43      |
| <i>AS4-PaRid-HA</i>                           | 52      | 26      |
| <i>AS4-PaRid-GFP-HA</i>                       | 61      | 34      |
| <i>PaRid</i> <sup>C403S</sup> - <i>HA</i>     | 0       | 89      |
| <i>AS4-PaRid</i> <sup>C403S</sup> - <i>HA</i> | 0       | 55      |
| <i>NcRID-HA</i>                               | 0       | 120     |
| <i>dmtA-HA</i>                                | 0       | 112     |
| <i>Masc1-HA</i>                               | 0       | 86      |

A collection of alleles was introduced in a  $\Delta PaRid$  strain and subsequent transformants were crossed to a  $\Delta PaRid$  strain of compatible mating type. Number of fertile versus sterile

transformants is indicated in the table. When none of the transformants showed a restored fertility, PCR amplifications were performed to check the presence of full-length ectopic alleles. Those from which we cannot amplify the corresponding fragment were discarded. For each transformation experiments, expression of the HA-tagged proteins was assayed by western blot on a subset of transformants (see S7 Fig). See results section for details on allele features.

To investigate whether the putative enzymatic function of the PaRid protein was essential to *P. anserina*'s sexual development, we constructed the *PaRid*<sup>C403S</sup>-HA and the *AS4-PaRid*<sup>C403S</sup>-HA point-mutated alleles, which both encode a catalytically-dead PaRid protein [1]. To perform the methylation transfer, this cysteine residue of the conserved PCQ triad (proline-cysteine-glutamine) located in motif IV forms a covalent bond with the cytosines that will be modified (Fig 1D). This cysteine residue is invariant in all eukaryotic C5-cytosine methyltransferases and its substitution results in loss of activity in mammalian DNA methyltransferases Dnmt3A and Dnmt3B [42]. After transformation of a knockout  $\Delta$ *PaRid* strain, independent phleomycin-resistant transformants were recovered (N=89 for the *PaRid*<sup>C403S</sup>-HA allele and N=55 for the *AS4-PaRid*<sup>C403S</sup>-HA allele). Although they presented at least one full-length copy of either the *PaRid*<sup>C403S</sup>-HA allele or the *AS4-PaRid*<sup>C403S</sup>-HA, none of these transformants showed any complementation of the  $\Delta$ *PaRid* sterility (Table 1). For a subset of them, we confirmed that the corresponding point-mutated protein PaRid<sup>C403S</sup> was readily expressed (S7 Fig). Again, these transformants could not be distinguished from  $\Delta$ *PaRid* mutants when crossed to either wild-type strains or  $\Delta$ *PaRid* mutant strains.

Finally, since the Masc1/RID proteins are phylogenetically and structurally related and they might play a conserved role during sexual development, at least for the *A. nidulans* and *A. immersus* orthologs, we transformed the *DmtA*-HA and *Masc1*-HA alleles but also the *NcRid*-HA, independently, under the control of a functional promoter, into the  $\Delta$ *PaRid*

background. None of the independent phleomycin-resistant transformants that were recovered showed restoration of sexual reproduction (N=120 for the *NcRid-HA* allele, N=112 for the *DmtA-HA* allele and N=86 for the *Masc1-HA* allele, Table 1), indicating that inter-species complementation is ineffective.

## **PaRid cellular localization**

To investigate the subcellular localization of PaRid, we expressed two GFP-tagged chimeric versions of this protein (Table 1 and Fig 3). The *PaRid-GFP-HA* allele was driven by its native promoter, while the *AS4-PaRid-GFP-HA* allele was driven by the highly and constitutively active *AS4* promoter. After transformation of a  $\Delta PaRid$  strain, independent phleomycin-resistant transformants were recovered (N=63 for the *PaRid-GFP-HA* allele and N=95 for the *AS4-PaRid-GFP-HA* allele). Since 32% of the phleomycin-resistant strains obtained after transformation with the *PaRid-GFP-HA* allele and 64% of those obtained after transformation with the *AS4-PaRid-GFP-HA* allele showed a complete restoration of the  $\Delta PaRid$  fertility defect (Table 1), both tagged-alleles were proven to be expressed and to encode functional proteins. Fluorescence under the native promoter was too weak to be monitored so that overexpression constructs were subsequently analyzed. All the complemented *AS4-PaRid-GFP-HA* transformants had a wild-type phenotype (*i.e.*, displayed no spurious phenotypes that could be linked to PaRid constitutive overexpression). The PaRid-GFP fluorescence was observed in the female gametes (ascogonia and protoperithecia, Fig 3A and B) but neither in mycelium nor in the male gametes (spermatia). This expression pattern is in line with both the  $\Delta PaRid$  maternal sterility and the absence of *PaRid* ESTs in vegetative mycelium. Surprisingly, fluorescence could no longer be observed in croziers (formed around 30 hours post-fertilization) (Fig 3C), but signal resumed during ascospore formation (from 42 to 96 hours post-fertilization) (Fig 3D). In ascospores, PaRid-GFP was both nuclear and cytoplasmic.

Notably, such temporary loss of fluorescence in the *P. anserina*'s crozier cells was not an isolated observation concerning nuclear proteins [43]. One can hypothesize that this cell-specific drastic reduction of GFP brightness might result from either low pH or high oxiradical contents [44,45]. On the contrary, seeing some GFP signal further supports the detection of *PaRid* transcripts by RT-PCR up to 96 hours post-fertilization (S1A and B Figs), whereas in the microarray experiments, the ratio of ascogenous tissues versus vegetative tissues (perithecium envelope) might be low, thereby masking *PaRid*'s expression profile.

### **Transcriptomic reprogramming in response to $\Delta PaRid$ developmental arrest**

We explored the transcriptional profile of the  $\Delta PaRid$  micro-perithecia using *P. anserina*'s microarrays, representing 10556 predicted coding sequences (CDS) [46]. To this end,  $\Delta PaRid$  *mat*<sup>+</sup> female gametes were fertilized by wild-type *mat*<sup>-</sup> male gametes and micro-perithecia were collected 42 hours post-fertilization (T42). This time point was chosen to unravel the broadest set of differentially expressed genes, given that 1) micro-perithecia originating from  $\Delta PaRid$  crosses do not form croziers and thus might stop to develop around 30 hours (T30) post-fertilization, 2) in wild-type crosses, croziers are formed from 30 hours (T30) to 42 hours post-fertilization (T42) afterward karyogamy can proceed (Fig 4A). To identify the differentially expressed CDS (DE CDS), we compared the transcriptional profile of the  $\Delta PaRid$  micro-perithecia to that of the wild-type perithecia at both 24 (T24) and 30 (T30) hours post-fertilization (Bidard and Berteaux-Lecellier, GEO accession no. GSE104632), hypothesizing that these two time points likely correspond to the window of time that immediately precedes and/or spans the  $\Delta PaRid$  developmental arrest. Doing so, we identified 451 CDS which expression was either down-regulated (217 CDS) or up-regulated (234 CDS) by a fold change (FC)  $\geq 2$  (Table S5) at both T24 and T30 time points. This set of DE CDS represented 4.4 % of *P. anserina*'s predicted CDS. Actually, none of the CDS had opposite patterns of differential expression at T24 and T30.

### **Functional annotation of up- and down-regulated genes**

CDS with no predicted function or domain were not over-represented in neither down-regulated (72 out of 217) nor up-regulated (80 out of 234) sets of DE CDS when compared to the rest of the genome (Table S5). The fraction of DE CDS showing *N. crassa* or *S. cerevisiae* orthologs was 69.6% and 32.2% respectively in the down-regulated set and 50.9% and 11.9% respectively in the up-regulated set. These observations show that DE CDS having an ortholog either in *N. crassa* or in *S. cerevisiae* were significantly less abundant in the up-regulated set than in the down-regulated set (p-value = 0.0455 and  $3.10 \times 10^{-5}$ , respectively). This bias existed also when the up-regulated CDS having an ortholog either in *N. crassa* or in *S. cerevisiae* were compared to those of the complete *P. anserina*'s set of CDS (p-value = 0.0317 and  $9.38 \times 10^{-8}$ , respectively). This might indicate that the down-regulated set belongs preferentially to the conserved fungal genome core whereas the up-regulated set appears more divergent and species specific. We then performed a FunCat analysis [47] to better characterize the function of the DE CDS (Fig 4B, Table 2). Approximately two-third of them belonged to the "Unclassified" category (category number 99) either in the up- or down-regulated sets. Among the 72 classified CDS of the down-regulated set, no FunCat categories were enriched (See Table 2). By contrast, the up-regulated set was enriched in CDS that fell in the "Metabolism" (category number 01) and "Cellular transport" categories (category number 20).

**Table 2. Functional category analysis (FunCat).**

| FUNCTIONAL CATEGORY                           | Number of genes | Enrichment P-VALUE |
|-----------------------------------------------|-----------------|--------------------|
| <b>DOWN regulated genes</b>                   |                 |                    |
| 01 Metabolism                                 | 50              | 0.6015477193364    |
| 02 Energy                                     | 13              | 0.1175222171120    |
| 10 Cell cycle and DNA processing              | 25              | 0.2907628248754    |
| 11 Transcription                              | 27              | 0.2549629641085    |
| 12 Protein synthesis                          | 7               | 0.7780707022438    |
| 14 Protein fate                               | 22              | 0.8422873544643    |
| 16 Protein with binding function or co-factor | 51              | 0.8512335723436    |



|                                                           |           |                                     |
|-----------------------------------------------------------|-----------|-------------------------------------|
| requirement                                               |           |                                     |
| 18 Protein activity regulation                            | 14        | 0.1205020546264                     |
| 20 Cellular transport                                     | 29        | 0.6204933767605                     |
| 30 Cellular communication                                 | 16        | 0.1342730657708                     |
| 32 Cell rescue, defense and virulence                     | 24        | 0.3026236390720                     |
| 34 Interaction with the cellular environment              | 14        | 0.3090089528220                     |
| 40 Cell fate                                              | 13        | 0.1673709514827                     |
| 42 Biogenesis of cellular components                      | 27        | 0.0669108316950                     |
| 43 Cell type differentiation                              | 10        | 0.7303867300457                     |
| 99 Unclassified                                           | 145       | 0.9252711123620                     |
| <b>UP regulated genes</b>                                 |           |                                     |
| <b>01 Metabolism *</b>                                    | <b>57</b> | <b>1.251208625*10<sup>-09</sup></b> |
| 02 Energy                                                 | 8         | 0.0605014394295                     |
| 11 Transcription                                          | 5         | 0.9863844124318                     |
| 14 Protein fate                                           | 6         | 0.9874423656325                     |
| 16 Protein with binding function or co-factor requirement | 28        | 0.5725800327713                     |
| <b>20 Cellular transport *</b>                            | <b>25</b> | <b>0.0071875703621</b>              |
| 30 Cellular communication                                 | 3         | 0.8848848194025                     |
| 32 Cell rescue, defense and virulence                     | 15        | 0.0951283621522                     |
| 34 Interaction with the cellular environment              | 8         | 0.2011467605014                     |
| <b>36 Systemic interaction with the environment *</b>     | <b>2</b>  | <b>0.0002724146627</b>              |
| 40 Cell fate                                              | 4         | 0.6104680132063                     |
| 41 Systemic development                                   | 2         | 0.0761279956280                     |
| 43 Cell type differentiation                              | 9         | 0.1081833860122                     |
| 99 Unclassified                                           | 154       | 0.8954838244443                     |

\* Functional category significantly enriched, i.e. corresponding p-value < 0.05

## Comparison of PaRid regulated genes and mating-type target genes shows a significant overlap.

We compared the  $\Delta PaRid$  DE CDS to the mating-type target genes identified previously [48]. *P. anserina* has a typical heterothallic mating-type structure with two idiomorphs. The *MAT1-1* idiomorph (*mat-*) is characterized by the *MAT1-1-1* gene, which encodes the FMR1 MAT $\alpha$ -HMG domain containing protein, while the *MAT1-2* idiomorph (*mat+*) is composed of the *MAT1-2-1* gene, which encodes the FPR1 MATA\_HMG domain



containing protein (reviewed in [49]). Both proteins are transcription factors essential for fertilization in heterothallic Pezizomycotina and development of the fruiting bodies (reviewed in [37]). Microarray comparisons of wild-type *mat+* versus *fpr1<sup>-</sup>* mutant strains, and wild-type *mat<sup>-</sup>* versus *fmr1<sup>-</sup>* mutant strains revealed 571 and 232 target genes of FPR1 and FMR1, respectively [48]. The authors have determined that among the FPR1 target genes, 442 are activated and 129 are repressed. Similarly, among the FMR1 target genes, 151 are activated and 81 are repressed. Comparing these activated and repressed mating-type target genes with the genes down- and up-regulated in the  $\Delta PaRid$  mutant strain showed a significant overlap (Fig 4C, S5 Table). The 217  $\Delta PaRid$  down-regulated CDS contained 98 FPR1 activated targets, which was clearly indicative of a strong enrichment (p-value =  $5.40 \times 10^{-46}$ ). FPR1 acts also as a repressor: accordingly we found 14 FPR1 repressed targets among the 234  $\Delta PaRid$  up-regulated CDS, which did not correspond to any enrichment (p-value > 0.05) (Fig 4C, S5 Table). Strikingly, we noticed that there is no CDS that would be both down-regulated in the  $\Delta PaRid$  background and repressed by FPR1, while only two CDS were up-regulated in the  $\Delta PaRid$  background and activated by FPR1 (Fig 4C, S5 Table). This observation indicates a strong congruence of the regulatory pathways of PaRid and mating-type gene FPR1. Conversely, only 17 FMR1 targets were identified in the 541 PaRid regulated CDS. This low number of FMR1 targets (*mat<sup>-</sup>* idiomorph) is consistent with the  $\Delta PaRid$  *mat+* mutant strain being used as the female partner in the microarray experiments (Table 3) and our above observation that PaRid is dispensable in the male partner (here *mat<sup>-</sup>*). Out of the 17 FMR1 targets, five were found in the  $\Delta PaRid$  down-regulated CDS set whereas 12 were found in the  $\Delta PaRid$  up-regulated CDS set (S5 Table).

### **Most of the down-regulated DE CDS are involved in developmental pathways.**

The down-regulated  $\Delta PaRid$  CDS set was enriched in transcription factors (TFs, p-value =  $1.02 \times 10^{-4}$ ). Notably, out of the 17 TFs identified (S6 Table, S8 Fig), 11 were also FPR1 targets. Furthermore, Pa\_1\_16860 and Pa\_3\_1720 orthologs in *N. crassa* [50,51] and *A. nidulans* [52,53] influence sexual development (S6 Table). On the same note, the

*N. crassa* ortholog of Pa\_1\_22930 plays a significant role in sexual development [51]. Yet, we did not identify in this down-regulated CDS set, the *P. anserina*'s orthologs of most of the *N. crassa* TFs that have been found to be differentially expressed during sexual development [50,54–57].

We also noticed three enzymes related to NAD/NADP oxidoreduction and belonging to the developmental class: a NADPH dehydrogenase (Pa\_6\_6330), a NADP-dependent oxidoreductase (Pa\_5\_11750) and a glycerol-3-phosphate dehydrogenase [NAD<sup>+</sup>] (Pa\_1\_6190), as well as proteins involved in cellular signal transduction by regulating the phosphorylation status of the intracellular inositol trisphosphate messenger, including PalPK2 [58] (Pa\_5\_1490, Pa\_6\_9890, Pa\_1\_18990). Interestingly, inositol phosphates are required for both fruiting body number and proper development in *Sordariales* [59].

In this down-regulated set, we also identified widely conserved CDS regulating cell division: Ras GTPase-activating proteins (Pa\_1\_10960 and Pa\_6\_7140), Rho-GTPase-activating protein (Pa\_7\_10800), cell division control protein (Pa\_3\_3430), replicating licensing factor (Pa\_4\_8520) and serine/threonine-protein kinases (Pa\_1\_9100 and Pa\_7\_9140). In line with active DNA replication, we also spotted some enzymes or cofactors involved in the nucleotide metabolism, such as a 3',5'-cyclic-nucleotide phosphodiesterase (Pa\_7\_2860), a dimethyladenosine transferase (Pa\_2\_13220) and two guanine nucleotide-binding protein alpha-2 subunits (Pa\_2\_10260, Pa\_5\_11490). The reduced expression of genes involved in promoting cell division was clearly in line with the growth arrest of the  $\Delta PaRid$  micro-perithecia. The developmental category may be more informative to uncover some CDS acting downstream of the PaRid network. In this category, we identified the PEX3 peroxisomal biogenesis factor (Pa\_7\_8080). The crucial role of  $\beta$ -oxidation and the glyoxylate cycle during sexual development has already been documented [60]. We also found a VelvetA-like-1 protein (VeA, Pa\_3\_6550) [61]. Present in many fungi, the Velvet protein complex seems to have expanded its conserved role in developmental programs to more specific roles related to each organism's needs [62,63]. Likewise, the *IDC1* gene that

was found down-regulated in this study is required for both cell fusion and development of the envelope of the fruiting bodies. The list of the down-regulated CDS includes a putative protein presenting a fascilin (FAS1) domain. Such extracellular domain is thought to function as a cell adhesion domain [64] and therefore might play a key role in the development of multicellular structures. A further connection to cell shape dynamics and cytoskeleton was found with the down-regulation of an annexin protein (Pa\_6\_1130). This calcium-dependent phospholipid-binding protein family has been linked with membrane scaffolding, organization and trafficking of vesicles, endocytosis, exocytosis, signal transduction, DNA replication, etc. The *N. crassa* homolog of this annexin (NCU04421) was shown to be up-regulated during asexual sporulation [65].

The gene expression regulation class mostly contained general regulating factors as CDS encoding chromatin remodeling proteins. As down-regulated chromatin remodeling factors, we identified two histone-lysine N-methyltransferases, Pa\_7\_3820 homologous to Set-9/KMT5, which methylates the lysine 20 of histone H4 [66] and Pa\_3\_3820 homologous to set-4, one acetyltransferase (Pa\_3\_10520), one ATP-dependent RNA helicase (Pa\_4\_8200) and one SNF2 family ATP-dependent chromatin-remodeling factor (Pa\_7\_9570). Some CDS encoding DNA/RNA processing factors were also found down-regulated in the  $\Delta PaRid$  mutant micro-perithecia. As such, we identified a putative cruciform DNA recognition protein (Pa\_2\_440), an ATPase involved in DNA repair (Pa\_6\_4260), a SIK1-like RNA-binding protein (Pa\_5\_12950) and the telomere length regulator protein rif1 (Pa\_1\_3890). In mammals as in yeast, Rif1 is required for checkpoint-mediated cell cycle arrest in response to DNA damage [60].

# **Analysis of the up-regulated CDS set uncovers enrichment in the “Metabolism” and “Cellular transport” functional categories.**

Half of the 26 most up-regulated CDS were putative proteins of unknown function devoid of conserved domains (Table S5), included the one showing the highest FC

(Pa\_4\_5390). Two CDS encoded enzymes involved in the metabolism of amino acids (Pa\_4\_140 and Pa\_1\_5740), two were encoding transporters (Pa\_3\_420 and Pa\_6\_11600) and three CDS were involved in secondary metabolism (Pa\_4\_4580, Pa\_5\_11000 and Pa\_5\_720, see below).

More importantly, CDS belonging to primary metabolism were enriched in this up-regulated set (p-value =  $2.35 \times 10^{-9}$ ). For instance among the CAZymes, 11 glycoside hydrolases (GH) were found in this set (enrichment p-value = 0.0186). The predicted secondary metabolite clusters identified in this study are mostly composed of CDS encoding proteins of unknown function. Nonetheless, some of them contain CDS encoding putative secondary metabolism related functions: HC-toxin synthetases (Pa\_3\_11193, Pa\_3\_11220), cytochrome P450 proteins (Pa\_3\_2900, Pa\_4\_4580, Pa\_4\_4570, Pa\_1\_9520, Pa\_6\_7810), polyketide synthase (Pa\_5\_11000), multidrug efflux systems (Pa\_3\_11220, Pa\_4\_3775), trichodiene oxygenase (Pa\_3\_5540) and an O-methylsterigmatocystin oxidoreductase (Pa\_2\_7080). If they are not the result of cellular stresses induced in the  $\Delta PaRid$  mutants, these secondary metabolites could act as secondary messengers during *P. anserina* sexual development. CDS encoding transporters were also over-represented in the up-regulated CDS set (p-value = 0.0071, see Table 2), as if arrest of perithecium development would generate cellular flux. Surprisingly, we also identified eight CDS encoding HET domain-containing proteins (Pa\_2\_4570, Pa\_2\_9350, Pa\_2\_8040, Pa\_3\_2610, Pa\_5\_1080, Pa\_5\_7650, Pa\_6\_1970, Pa\_6\_6730) (enrichment p-value = 0.0390). The HET gene family is known to prevent cell fusion in filamentous fungi by inducing cell death program when genetically different nuclei cohabit in a common cytoplasm [68]. Formation of heterokaryotic mycelia and potential incompatibility responses to non-self are vegetative processes that might be repressed through the PaRid network.

## Discussion

Sexual reproduction is considered to be essential for long-term persistence of eukaryotic species [69]. Only a few asexual lineages are known to persist over a long period of time without sex [70], most eukaryotes engaging sexual reproduction at some point in their life cycle. Studies have shown that sex reduces the accumulation of deleterious mutations compared to asexual reproduction [71] but also provide a faster adaptive response, by bringing together favorable gene combinations [72,73]. In multicellular eukaryotes, sexual reproduction is controlled by strict mechanisms governing which haploids can fuse (mating) and which developmental paths the resulting zygote will follow. These strict mechanisms are both genetically and epigenetically determined. Among the epigenetic modifications that control gene expression, DNA methylation reprogramming allows cells to shape their identity by launching and maintaining differential transcriptional programs in each cell type. In mammals, specific differential genomic DNA methylation patterns of parental gametes, known as ‘DNA methylation imprints’ are not essential to karyogamy but to zygotic development [74] while global genomic demethylation in *A. thaliana* results in male-fertile but female-sterile plants [23,24]. It has been hypothesized that the regulation of gene expression by DNA methylation during the development of higher eukaryotes may have been acquired from ancestral mechanisms of genome defense against invasive repetitive elements such as transposons. Some of the multicellular fungi are endowed with a homology-based genome defense system (RIP or RIP-like) exhibiting epigenetic features in addition to a functional link to sexual development [11,18]. Nonetheless, very little is known about epigenetic regulation of gene expression and development in multicellular fungi, although animal and fungi are each other’s closest relatives. In this study, we took advantage of a model ascomycete that displays on-going RIP but no DNA methylation [14], to explore the role of PaRid, a DMT-like protein, part of the Masc1/RID family, conserved in fungi [11,12].

## PaRid is involved in the formation of croziers

We report that PaRid plays a central role in the mid-time course of sexual development of *P. anserina*. Homozygous  $\Delta PaRid$  crosses, as heterozygous ones, can perform fertilization, which depends on the recognition of male cells by female organs. Therefore PaRid is not involved in the early steps of sexual development. However, the *PaRid* wild-type allele must be expressed in the female gametes for further perithecium development. The most conspicuous developmental step after fertilization is the formation of the dikaryotic cells, which is preceded by the division of parental nuclei in a syncytium (ascogonial plurinucleate cell). If PaRid is absent from the maternal lineage, the perithecia stop to grow prematurely (micro-perithecia phenotype) and no croziers emerge from the biparental plurinucleate ascogonial cells that they contain. Furthermore providing surrogate maternal tissue either by grafting the mutant micro-perithecia to a wild-type mycelium or by introducing a  $\Delta mat$  partner to the  $\Delta PaRid mat^+$  ;  $\Delta PaRid mat^-$  dikaryon did not rescue the maturation defect of the fruiting bodies, as previously shown for some of the *P. anserina* female sterile mutants [39,75–77]. This result demonstrates that the  $\Delta PaRid$  mutant sterility is not due to a perithecium envelope building failure, nor to an improper feeding of the maturing fruiting body, but to the lack of ascogenous tissue. To date, among the *P. anserina* sterile mutants that have been studied, these macroscopic (micro-perithecia) and microscopic (no dikaryotic cells) phenotypes are both found only in the  $\Delta Smr1$  mutant [78]. SMR1, MAT1-1-2 in the standard nomenclature [79], is a conserved protein of unknown molecular function, which is required for the initial development of the dikaryotic stage of both *Gibberella zeae* [80] and *Sordaria macrospora* [81]. A noticeable difference between *PaRid* and *SMR1/MAT1-1-2* is that the former must be present in the maternal lineage (*mat*<sup>+</sup> or *mat*<sup>-</sup>), while the latter is present only in the *mat*<sup>-</sup> nucleus (male or female). Genetic observations support the idea that SMR1 diffuses from *mat*<sup>-</sup> to *mat*<sup>+</sup> nuclei inside the fruiting body, even if *mat*<sup>-</sup> nuclei come from a male gamete [82]. In contrast, our observations based on the tagging of PaRid with the GFP indicate that this gene is not expressed in the male gamete, and complementation experiments suggest that *PaRid* is not expressed in nuclei coming from male gametes inside the perithecia. It has been proposed that SMR1 releases

the developmental arrest following inter-nuclear recognition between two compatible nuclei in the plurinucleate ascogonial cell and could consequently trigger crozier formation [83]. Besides, in contrast to the  $\Delta PaRid$  and  $\Delta Smr1$  deletions, the previously identified *P. anserina* mutants affecting the zygotic lineage (*Smr2*, *Cro1* and *Ami1*), generate either uninucleate croziers [33,34,78] or plurinucleate croziers [84]. Consequently, because the corresponding mutants do indeed form these early hook-shaped structures, *PaRid* probably acts at earlier developmental stages than *Smr2*, *Cro1* and *Ami1*, in line with its expression pattern. Taken together, these data suggest that *SMR1* releases the developmental arrest following inter-nuclear recognition by diffusing from the *mat-* to *mat+* nucleus, while *PaRid* is a maternal gene that is required for further development, especially the formation of the croziers.

## ***PaRid* is an activator of the mid-time course of *P. anserina*'s sexual development**

In an effort to uncover the *PaRid* regulatory network and identify potential co-factors, we performed a transcriptomic analysis of mutant crosses. Strikingly, this study established that almost half of the CDS activated by *PaRid* (45.16% of the down-regulated set) are also activated by the *FPR1* transcription factor [48]. In agreement with the fertilization ability of  $\Delta PaRid$ , the *mat+* prepropheromone gene and the *mat+* pheromone receptor gene are not included in the set of genes down-regulated in  $\Delta PaRid$  background. Consequently, we concluded that 1) *PaRid* is a key actor of the middle steps of *P. anserina* sexual development; 2) *PaRid* along with *FPR1* is involved in the developmental pathway that follows fertilization and leads to formation of dikaryotic cells; 3) *PaRid*, as *FPR1*, is an activator of this pathway. Furthermore, the expression of *FPR1* is not deregulated in the  $\Delta PaRid$  mutant background, and conversely the expression of *PaRid* is not deregulated in the *fpr1* mutant background [48]. This result suggests that *PaRid* acts neither upstream nor downstream of *FPR1*, but rather as an independent branched pathway (Fig 5). The *PaRid*-regulated CDS set includes many *FPR1* targets (*n* = 112) and few *FMR1* targets (*n* = 17). This observation further supports the maternal effect of the *PaRid* deletion, as we have used



a *mat+* (FPR1) strain as a maternal strain in our experiments. Determination of mating-type gene targets was performed at the stage of competence for fertilization [48], a stage belonging to the very early steps of sexual development of perithecia. As the mating-type gene targets are likely to vary according to the developmental stage [83], their determination in the middle steps of fruiting-body development would be more appropriate to the comparison with those of PaRid and might reveal even more extensive overlap. MAT1-2-1 (FPR1) and MAT1-1-1 (FMR1) are ubiquitous in Pezizomycotina (reviewed in [49]). We propose that the overlap of mating-type targets genes and PaRid-regulated genes is present in all fungi in which the inactivation of *Rid* results in sexual development defect. At present, *Rid* linked sexual defect were described in *A. immersus* [11] and *A. nidulans* [18]. Unfortunately, neither mating type target genes nor *Rid* regulated genes were available in these fungi to test our proposal.

However, this list of DE CDS did not draw a clear picture of a potential epigenetic regulation process, if any, in which PaRid could be involved, nor the nature of the Repressor 1 (Fig 5). Notably, neither the constitutive heterochromatin factors (the putative H3K9me3 methylase: Pa\_6\_990, the ortholog of the heterochromatin protein 1: Pa\_4\_7200, the components of the DCDC complex of *N. crassa* [85]: Pa\_6\_250, Pa\_7\_5460, Pa\_2\_10970, Pa\_3\_6830) nor the facultative heterochromatin factors (Pa\_1\_6940 encoding the putative H3K27 methylase and the associated subunits of the PRC2 complex: Pa\_3\_4080, Pa\_2\_11390) are differentially expressed. Genes involved in the STRIPAK complex [86] were not differentially expressed either. In consequences, the nature of Repressor 1 cannot be hypothesized yet (Fig 5). Nonetheless, this study identified a set of TFs that might be candidate to enter the specific *PaRid* genetic network, since eight out of 17 TFs of the  $\Delta PaRid$  down-regulated CDS set are not FPR1 targets. Additional functional studies on a selected subset of specifically DE CDS identified in this study are required to explore the PaRid downstream pathway(s) which are essential to sexual development.



By contrast to the down-regulated set, the up-regulated one only contains a handful of developmentally relevant CDS. The functional annotation of the up-regulated set points toward CDS involved in physiological responses to the cellular stress following micro-perithecium developmental arrest.

## One toolkit, different outcomes

The  $\Delta PaRid$  mutant phenotype resembles the ones observed in *A. immersus* [11] and in *A. nidulans* [18], where development of croziers and of the subsequent ascospores are never observed in *Masc1* mutants or *dmtA* mutants, respectively. Remarkably, sexual development of homozygous *T. reesei rid* mutant crosses deleted for the *rid* homolog (*TrRid*) allows the formation of dikaryotic cells but is blocked during karyogamy (Wan-Chen Li and Ting-Fang Wang, personal communication). On the contrary, neither barren perithecia nor fertility defect are observed in *N. crassa* crosses homozygous for the *rid* null allele [12], although this fungus shows heavy DNA methylation of repeats subjected to RIP. The function of *rid* orthologs has also been addressed in fungal species that reproduce asexually (*Aspergillus flavus* [87], *Cryphonectria parasitica* [88], *Metarhizium robertsii* [89]). Interestingly, in these species, in addition to a decrease of DNA methylation contents, the absence of DMT-like fungal specific Masc1/RID proteins results in a large palette of phenotypes including reduction of clonal dispersion (conidiation and sclerotial production), defects of mycelium morphology, decrease in secondary metabolite production and/or virulence toward plant hosts. In *Magnaporthe grisea*, a pathogenic fungus that can reproduce through both sexual and asexual reproduction, deletion of the *rid* ortholog also has a negative impact on conidiation and mycelium morphology but not on virulence [74].

Altogether, these observations are puzzling. It has led us to consider why such a gene, known to be involved in RIP-like genome defense systems and conserved both in terms of presence and sequence identity, would play an essential role during the sexual development in organisms showing RIP mutations at low level, and very little genomic DNA

methylation, if any [14]. One can wonder if RIP, as a genome defense mechanism operating after fertilization but before karyogamy, is not by itself a checkpoint required for the development of dikaryotic hyphae in *P. anserina*, *A. nidulans* and *A. immersus*, and for karyogamy in *T. reesei*. In this hypothesis, in the absence of the ‘genomic quality control’ of the two haploid parental nuclei performed by RIP before every single karyogamy, the sexual development might stop. In this study, it was not possible to test whether PaRid is also required for RIP since homozygous  $\Delta PaRid$  mutant crosses were barren, except for rare sporadic asci (only 3 recovered to date) and RIP frequency is low in *P. anserina* [33]. Nevertheless, all of the 12 ascospores that we recovered from these mutant crosses were indistinguishable from those of wild-type: their shape and pigmentation were standard, they germinated efficiently and subsequent genetic analyses showed that they did not result from uniparental lineages. Consequently, if RIP functions as a checkpoint, it does not prevent viability of progeny that circumvents the function of PaRid. In *N. crassa*, after karyogamy, genome integrity is further checked through the meiotic silencing of unpaired DNA process (MSUD) [91]. MSUD proceeds during meiosis to reversibly silence genes contained in DNA segments that are not paired with their homolog during meiotic homolog pairing. Because evolution often scrambles chromosomal micro-syntheny, the MSUD prevents interspecific crosses. If deletion of *PaRid* results in RIP deficient strains, then inactivation of genome defense system acting on haploid parental nuclei has clearly different outcomes, since it would promote repeat spreading.

### **Ancestral dual roles for DMT-like fungal specific Masc1/RID?**

Alternatively, PaRid might play a dual role, possibly relying on two independent enzymatic functions: one as the central effector of RIP and the other as a positive regulator of gene expression during the early steps of sexual development. Our results show that the PaRid function relies on its methyltransferase activity, and that this enzymatic activity has to be present in the female partner. Ascogonia, the female gametes, are small structures of specialized hyphae that differentiate within the mycelium [37]. As such, they represented an

extremely low fraction of the so-called “vegetative” tissue when four-day-old mycelium was collected to extract total RNA. This might be why no *PaRid* mRNAs were detected at this stage while genetic data further supported by cytoplasmic observations indicate that *PaRid* is specifically present in the female gametes. Besides, since driving its expression from a constitutive promoter did not result in any unusual phenotypes, regulation of *PaRid* expression, both in terms of timing and cell-type specificity, might proceed through post-transcriptional and/or post-translational mechanisms. Although we did not detect any evidence of antisense *PaRid* transcript as described in *A. nidulans* [18], regulation of expression through non-coding RNA (ncRNA) is widely conserved in mammals, drosophila, plants and *S. pombe* [92,93]). Therefore, we cannot rule out that the *PaRid* pattern of expression is also regulated by ncRNA. Alternatively, the *PaRid* half-life might be tightly regulated by the ubiquitin proteasome system (UPS) [94–97]. Again, this hypothesis remains to be further explored.

Masc1/RID fungal-specific DMTs-like form a quite ancient group of proteins, whose initial DNA-methyltransferase function may have evolved differently in distinct lineages. The predicted structures of RID homologues, although conserved, are not identical [98]. In particular, the Masc1/DmtA/TrRid/*PaRid* proteins include a compact catalytic domain with a short C-terminal extension (at most 133 amino acids for *P. anserina*) when compared to that of *N. crassa* (260 amino acids). Mutant analyses revealed that the Masc1/DmtA/TrRid/*PaRid* proteins fulfill both sexual developmental functions and genome defense (either RIP is still active or traces of RIP are present as relics in the genomes), whereas the *N. crassa* RID protein plays a more specialized role, limited to its genome defense function. Taken these observations altogether, one can wonder whether the long C-terminal extension of *N. crassa* RID is responsible for its restricted function. However, neither the *Masc1* allele, nor the *DmtA* allele, restored the fertility defect of  $\Delta PaRid$  mutants. This may indicate that despite a structural and functional conservation of the Masc1/DmtA/TrRid/*PaRid* group of proteins, some species-specific co-factors would be required for enzymatic catalysis. To date, none of

them has been identified, although it has been suggested that the DIM-2 ortholog of *M. grisea*, MoDIM-2, mediates the MoRID *de novo* methylation [90,99].

Finally, since the Masc1/DmtA/TrRid/PaRid group appears to have a non-canonical motif VI structure when compared to all other prokaryotic and eukaryotic C5-cytosine methyltransferases [1], it is possible that this class of enzymes has acquired exclusive catalytic and/or substrate properties [32]. Although they do not share the features of Dnmt2, the mammalian tRNA cytosine methyltransferase, one can hypothesize that some of these fungal DMT-like enzymes could methylate RNA substrate(s). If true, this might explain why no clear nuclear localization signal was found in the PaRid protein and provide a consistent molecular basis to explain the maternal effect of the  $\Delta PaRid$  mutation. However, to date, only N6-methyladenosine (m6A), the most prevalent modification of mRNA in eukaryotes, has been linked to developmental functions. For example, the budding yeast N6-methyladenosine IME4 controls the entry of diploid cells into meiosis [100] while lack of the *A. thaliana* ortholog MTA leads to embryonic lethality [101].

Further functional studies on the fungal DMT-like proteins should also help understand whether the critical PaRid-related developmental program is a conserved feature of Pezizomycotina, secondarily lost by *N. crassa* during fungal evolution.

## Materials and methods

### Strains and culture conditions

The strains used in this study derived from the « S » wild-type strain that was used for sequencing [35,102]. Standard culture conditions, media and genetic methods for *P. anserina* have been described [40,103] and the most recent protocols can be accessed at <http://podospora.i2bc.paris-saclay.fr>. Construction of the  $\Delta mus51::su8-1$  strain lacking the mus-51 subunit of the complex involved in end-joining of broken DNA fragments was described previously [104]. In this strain, DNA integration mainly proceeds through homologous recombination. Mycelium growth is performed on M2 minimal medium. Ascospores do not germinate on M2 but on a specific G medium. The methods used for nucleic acid extraction and manipulation have been described [105,106]. Transformation of *P. anserina* protoplasts was carried out as described previously [107].

### Identification and deletion of the *Podospora PaRid* gene

The *PaRid* gene was identified by searching the complete genome of *P. anserina* with tblastn [108], using RID (NCU02034.7) [12] as query. One CDS Pa\_1\_19440 (accession number CDP24336) resembling this query with significant score was retrieved. To confirm gene annotation, *PaRid* transcripts were amplified by RT-PCR experiments performed on total RNA extracted from developing perithecia (female partner *mat+*/male partner *mat-*) at either 2 days (T48) or 4 days (T96) post-fertilization using primers 5s-*PaRid*/3s-*PaRid* (See S1 Table). Sequencing of the PCR products did not identify any intron in the *PaRid* ORF, thus confirming the annotation (see S1B Fig).

Deletions was performed on a  $\Delta mus51::su8-1$  strain as described in [76] and verified by Southern blot as described in [109]. Because *PaRid* is strongly linked to the mating-type locus, the gene deletion has been performed in the two mating-type background to get sexually compatible  $\Delta PaRid$  mutants.

## Allele construction

Two plasmids were mainly used in this study: the pAKS106 plasmid which derived from the pBCPhleo plasmid [110] and the pAKS120 plasmid which derived from pAKS106. pAKS106 contains an HA tag sequence followed by the *ribP2* terminator at the unique *ClaI* and *Apal* sites [111]. The pAKS120 was generated by cloning the promoter of the *AS4* gene, which is highly and constitutively expressed throughout the life cycle [41], at the unique *NotI* site. Thus, recombinant C-terminus HA-tagged proteins can be produced from pAKS106 and pAKS120, the expression of the corresponding fusion gene being either under the control of its own promoter (pAKS106) or under the control of the constitutive highly expressed *AS4* promoter (pAKS120). Because our allele construction strategy required high-fidelity DNA synthesis, all PCR amplifications were performed using the Phusion High Fidelity DNA polymerase (Thermo Scientific), according to the manufacturer's protocol and the resulting alleles were systematically sequenced to ensure that no mutation was introduced during PCR amplification (see S1 Table for primers sequences) and that, when relevant, the HA-tag or GFP sequences were in the appropriate reading frame.

## Constructing the *PaRid*-HA and *AS4-PaRid*-HA alleles and their GFP-tagged

**version.** To complement the  $\Delta PaRid::hph$  mutant strain, the wild-type *PaRid* allele was cloned into the pAKS106 plasmid. To this end, the wild-type *PaRid* allele was PCR amplified from the GA0AB186AD09 plasmid [35], using the primers PaRIDHAFXbaI and PaRIDHAREcoRI (see S1 Table). The 2914-bp amplicon, which corresponds to 653-bp promoter sequence followed by the complete *PaRid* CDS, minus the stop codon, was digested with the *XbaI*/*EcoRI* restriction enzymes and cloned into the pAKS106 plasmid, also hydrolyzed with the *XbaI*/*EcoRI* restriction enzymes to obtain the *PaRid*-HA allele. In order to put the *PaRid* allele under the control of a highly and constitutively expressed promoter, we then constructed the *AS4-PaRid*-HA allele. To do so, the wild-type *PaRid* allele was PCR amplified from the GA0AB186AD09 plasmid [35], using the primers PaRIDAS4XbaI and PaRIDHAREcoRI (see S1 Table). This pair of primers was designed to amplify the complete

*PaRid* ORF, minus the stop codon. The resulting 2263-bp amplicon was digested with the *XbaI/EcoRI* restriction enzymes and cloned into the pAKS120 plasmid, also hydrolyzed with the *XbaI/EcoRI* restriction enzymes.

To tag the *PaRid* protein with the Green Fluorescent Protein (GFP), we PCR amplified the ORF of the *eGFP* minus the stop codon with primers RIDGFPF*EcoRI* and RIDGFPR*Clal* (see S1 Table), using the pEGFP-1 plasmid (Clontech, Mountain View, CA) as template. The resulting 713-bp fragment was digested with *EcoRI* and *Clal* and cloned in frame with the *PaRid* allele either into the *PaRid*-HA plasmid or the AS4-*PaRid*-HA plasmid (see above), previously digested with the same restriction enzymes. This yielded the chimeric *PaRid*-GFP-HA and AS4-*PaRid*-GFP-HA alleles.

**Constructing the site-directed mutant *PaRid*<sup>C403S</sup>-HA.** The *PaRid*<sup>C403S</sup> allele was constructed by *in vitro* site-directed mutagenesis. The GA0AB186AD09 plasmid harboring the wild-type *PaRid* allele was amplified by inverse PCR, using the divergent overlapping primers RIDmut1 and RIDmut2. The RIDmut1 primer leads to G-to-C substitution at position 1208 of the *PaRid* sequence (see S1 Table, marked in bold italics), that matches the converse C-to-G substitution located in the RIDmut2 primer (see S1 Table, marked in bold italics). The PCR amplicons were digested with the *DpnI* enzyme (Fermentas), self-ligated and then transformed into *E. coli* competent cells. The *PaRid* allele was sequenced from several plasmids extracted from independent chloramphenicol resistant *E. coli* colonies. One allele showing no other mutation but the directed TGT (cysteine) to TCT (serine) transversion was selected as the *PaRid*<sup>C403S</sup> allele. The *PaRid*<sup>C403S</sup> allele was then PCR amplified using the primers PaRIDHAFXbaI and PaRIDHAREcoRI. The 2914-bp amplicon, which corresponds to 653-bp promoter sequence followed by the complete *PaRid* ORF, at the exception of the stop codon, were digested with the *XbaI/EcoRI* restriction enzymes and cloned into the pAKS106 plasmid, also hydrolysed with the *XbaI/EcoRI* restriction enzymes. This resulted in the *PaRid*<sup>C403S</sup>-HA allele. Then, to get the *PaRid* allele under the control of a highly and constitutively expressed promoter, we constructed the AS4-*PaRid*<sup>C403S</sup>-HA allele.



To do so, the *PaRid*<sup>C403S</sup> allele was PCR amplified from the pAKS106-*PaRid*<sup>C403S</sup>-HA, using the primers PaRIDAS4XbaI and PaRIDHAREcoRI (see S1 Table). This pair of primers was designed to amplify the complete *PaRid* ORF minus the stop codon. The resulting 2263-bp amplicon was digested with the *XbaI/EcoRI* restriction enzymes and cloned into the pAKS120 plasmid, also hydrolyzed with the *XbaI/EcoRI* restriction enzymes. This yielded the pAKS120-AS4-*PaRid*<sup>C403S</sup>-HA plasmid. All the PCR-amplified fragments were sequenced.

**Constructing the interspecific *NcRID*-HA, *dmtA*-HA and *Masc1*-HA alleles.** In order to introduce the *N. crassa* wild-type *rid* allele [12], into the *P. anserina*  $\Delta$ *PaRid::hph* mutant strain, we constructed the pAKS106-*rid*-HA plasmid. To this end, the *rid* gene was PCR amplified from wild-type *N. crassa* genomic DNA, using primers NcRIDHAFNotI and NcRIDHARBamHI (see S1 Table). The resulting 3420-bp amplicon, which corresponds to 861-bp of promoter sequence followed by the complete *rid* ORF, minus the stop codon, was digested with the *NotI/BamHI* restriction enzymes and cloned into the pAKS106 plasmid, also hydrolyzed with the *NotI/BamHI* restriction enzymes. This resulted in the *NcRid*-HA allele.

A different strategy was used to clone the *DmtA* gene from *A. nidulans* [18] and the *Masc1* gene from *A. immersus* [11]. Indeed, because these fungi were more distantly related to *P. anserina* than *N. crassa*, the wild-type CDSs were cloned into the pAKS120 plasmid and thus fused with the *P. anserina* AS4 promoter. To do so, the *DmtA* CDS was PCR amplified from a wild-type *A. nidulans* genomic DNA, using primers dmtAFXbaI and dmtARBamHI (see S1 Table). The resulting 1898-bp amplicon, which corresponds to the complete *DmtA* CDS, minus the stop codon, was digested with the *XbaI/BamHI* restriction enzymes and cloned into the pAKS120 plasmid, also hydrolyzed with the *XbaI/BamHI* restriction enzymes. This resulted into the *DmtA*-HA allele. Similarly, the *Masc1* allele was PCR amplified from a wild-type *A. immersus* genomic DNA, using primers AiRIDAS4XbaI and AiRIDHAREcoRI (see S1 Table). The resulting 1666-bp amplicon, which corresponds to the complete *Masc1* CDS, minus the stop codon, was digested with the *XbaI/EcoRI* restriction enzymes and cloned into



the pAKS120 plasmid, also hydrolyzed with the *XbaI/EcoRI* restriction enzymes. This resulted in the *Masc1-HA* allele. All PCR-amplified fragments were sequenced.

## Cytology & microscopy analysis

Perithecia were harvested from 12 to 96 h after fertilization. Tissue fixation was performed as in [112]. Pictures were taken with a Leica DMIRE 2 microscope coupled with a 10-MHz Cool SNAP<sub>HQ</sub> charge-coupled device camera (Roper Instruments), with a z-optical spacing of 0.5 mm. The GFP filter was the GFP-3035B from Semrock (Ex: 472nm/30, dichroic: 495nm, Em: 520nm/35). The Metamorph software (Universal Imaging Corp.) was used to acquire z-series. Images were processed using the ImageJ software (NIH, Bethesda).

## Phenotypic analyses

Spermatium counting was performed as follows: each strain was grown on M2 medium at 27°C for 21 days. To collect spermatia, cultures were washed with 1.5 mL of 0.05% Tween 20 in sterile water. Numeration proceeded through Malassez counting chamber. Grafting was assayed as in [40]. Western blot analyses were performed on perithecia grown for two days, as in [111]. We used the anti-HA high affinity monoclonal antibody from rat to recognize the HA-peptide (clone 3F10, ref 11 867 423 001, Sigma-Aldrich).

## Phylogenetic analysis

Orthologous genes were identified using Fungipath [113] and MycoCosm portal [114] and manually verified by reciprocal Best Hits Blast analysis. Sequences were aligned using MUSCLE (<http://www.ebi.ac.uk/Tools/msa/muscle/>) and trimmed using Jalview to remove non-informative regions (i.e. poorly aligned regions and/or gaps containing regions). Trees were constructed with PhyML 3.0 software with default parameters and 100 bootstrapped data set [115]. The tree was visualized with the iTOL version 4.3 (<http://itol.embl.de/>). Functional annotation was performed using InterPro 71.0 (<http://www.ebi.ac.uk/interpro/search/sequence-search>), Panther Classification System

version 14.0 (<http://www.pantherdb.org/panther/>), PFAM 32.0 (<http://pfam.xfam.org/>), Prosite (<http://prosite.expasy.org/>). Proteins were drawn using IBS v1.0.2 software (<http://ibs.biocuckoo.org/>)

## RNA preparation for microarray

The male partner was grown for 6 days at 27°C on M2 medium. Then, spermatia were collected by washing the resulting mycelium with 1.5 mL of H<sub>2</sub>O per Petri dish (10<sup>4</sup> spermatia / ml). The female partner strains were grown for 4 days at 27°C on M2 covered with cheesecloth (Sefar Nitex 03-48/31 Heiden). The sexual development time-course experiment started when female partners were fertilized by spermatia (1.5\*10<sup>4</sup> spermatia / cross). This time point was referred to as T0 (0 hour). By scraping independent crosses, samples of 20 to 100 mg of growing perithecia were harvested 24 hours (T24) and 30 hours (T30) after fertilization from wild-type crosses and 42 hours (T42) after fertilization from  $\Delta PaRid$  crosses and immediately flash-frozen in liquid nitrogen. For each time point, we collected three biological replicates originating from three independent crosses. The frozen samples materials were grinded using a Mikro-dismembrator (Sartorius, Goettingen, Germany). Total *P. anserina* RNA were extracted using the RNeasy Plant Mini Kit (Qiagen, Hilden, Germany) with DNase treatment. The quality and quantity of total RNA was assessed using a Nanodrop spectrophotometer (Nanodrop Technologies, Wilmington, USA) and the Bioanalyzer 2100 system (Agilent Technologies, Santa Clara, USA). This protocol was performed on three genetically distinct crosses as specified in Table 3.

**Table 3. Crosses used in transcriptome analysis.**

| Denomination                           | Crosses                                      | Female strain                | Male strain   | Sampling time |
|----------------------------------------|----------------------------------------------|------------------------------|---------------|---------------|
| <b>Wild type cross</b>                 | <i>S mat+</i> x <i>S mat-</i>                | <i>S mat+</i>                | <i>S mat-</i> | T24 and T30   |
| <b><math>\Delta PaRid</math> cross</b> | <i>S mat+</i> $\Delta PaRid$ x <i>S mat-</i> | <i>S mat+</i> $\Delta PaRid$ | <i>S mat-</i> | T42           |

## Labelling and microarray hybridization

Gene expression microarrays for *P. anserina* consisted of a custom 4×44 K platform (AMADID 018343, Agilent, Santa Clara, USA) containing 10,556 probes on each array with each probe in four replicates. Microarray hybridization experiments including target preparation, hybridization and washing were performed as described in [46]. The experimental samples were labeled with the Cy5 dye and reference sample with the Cy3 dye. The reference sample is a mixture of RNA extracted from different growth conditions.

## Microarray data acquisition, processing and analyses

Microarrays were scanned using the Agilent Array Scanner at 5µm/pixel resolution with the eXtended Dynamic Range (XDR) function. Array quality and flagging were performed as described [116]. Pre-processing and data normalization were performed with Feature Extraction (v9.5.3) software (Agilent technologies), with the GE2-v4\_95\_Feb07 default protocol. Statistical differential analysis were done using the MAnGO software [117], and a moderate *t*-test with adjustment of *p*-values [118] was computed to measure the significance with each expression difference. Differential analyses have been performed between the wild-type cross at 24 (T24) and 30 (T30) hours after fertilization and the mutant cross. Fold change values (FC) were calculated from the ratio between normalized intensities at each time of the time course. Differentially expressed (DE) coding sequences (CDS) in the  $\Delta PaRid$  cross were defined as those whose adjusted *P*-values are inferior to 0,001 and the absolute value of FC higher than 2. The resulting list was called DE CDS specific of  $\Delta PaRid$  cross. Microarray data reported in this paper have been deposited in the Gene Expression Omnibus database under the accession no. GSE104632. Functions of genes identified as up- or down-regulated in transcriptomics data were explored using FunCat functional categories (Level 1, as described in <http://pedant.gsf.de/pedant3htmlview/html/help/methods/funcat.html>). To assess whether any of the functions were observed in up- or down-regulated lists of genes at a frequency greater

860 than that expected by chance, p-values were calculated using hypergeometric distribution as  
861 described in [119].

862

## Author Contributions

Conceived and designed the experiments: RD, FB, FM. Performed the experiments: HT, RB, FB, ABJ, PG, VB, FC, FM. Analyzed the data: PG, HT, RD, FB, FM. Contributed reagents/materials/analysis tools: PG, HT, RB, FB, ABJ, VB, FC, FM. Wrote the paper: FM.

## Acknowledgments

We acknowledge the technical assistance of Sylvie François. We are thankful to Philippe Silar for providing resources to start the project as well as for fruitful scientific discussion and to Ting-Fang Wang for sharing unpublished data and stimulating scientific discussion. We thank Nadia Ponts for performing the DNA methylation assays and Gaëlle Lelandais for performing statistics. We thank Cécile Fairhead, Tatiana Giraud, Marc-Henri Lebrun, Nadia Ponts and Annie Sainsard-Chanet for critical reading of the manuscript and fruitful discussions. P.G., F.C. and F.M. were supported by grants from UMR8621, UMR9198 and Agence Nationale de la Recherche Grant ANR- 05-Blan-O385-02. We thank the Podospora Consortium for freely providing GA0AB186AD09 and of GA0AB186AD09.

# References

1. Goll MG, Bestor TH. Eukaryotic cytosine methyltransferases. *Annu Rev Biochem.* 2005;74:481-514.
2. Law JA, Jacobsen SE. Establishing, maintaining and modifying DNA methylation patterns in plants and animals. *Nat Rev Genet.* mars 2010;11(3):204-20.
3. Bestor TH. Cloning of a mammalian DNA methyltransferase. *Gene.* 25 déc 1988;74(1):9-12.
4. Finnegan EJ, Dennis ES. Isolation and identification by sequence homology of a putative cytosine methyltransferase from *Arabidopsis thaliana*. *Nucleic Acids Res.* 25 mai 1993;21(10):2383-8.
5. Kouzminova E, Selker EU. dim-2 encodes a DNA methyltransferase responsible for all known cytosine methylation in *Neurospora*. *EMBO J.* 1 août 2001;20(15):4309-23.
6. Okano M, Xie S, Li E. Cloning and characterization of a family of novel mammalian DNA (cytosine-5) methyltransferases. *Nat Genet.* juill 1998;19(3):219-20.
7. Cao X, Springer NM, Muszyński MG, Phillips RL, Kaeppler S, Jacobsen SE. Conserved plant genes with similarity to mammalian de novo DNA methyltransferases. *Proc Natl Acad Sci U S A.* 25 avr 2000;97(9):4979-84.
8. Henikoff S, Comai L. A DNA methyltransferase homolog with a chromodomain exists in multiple polymorphic forms in *Arabidopsis*. *Genetics.* mai 1998;149(1):307-18.
9. Lindroth AM, Cao X, Jackson JP, Zilberman D, McCallum CM, Henikoff S, et al. Requirement of CHROMOMETHYLASE3 for maintenance of CpXpG methylation. *Science.* 15 juin 2001;292(5524):2077-80.
10. Bartee L, Malagnac F, Bender J. *Arabidopsis* cmt3 chromomethylase mutations block non-CG methylation and silencing of an endogenous gene. *Genes Dev.* 15 juill 2001;15(14):1753-8.
11. Malagnac F, Wendel B, Goyon C, Faugeron G, Zickler D, Rossignol JL, et al. A gene essential for de novo methylation and development in *Ascomobolus* reveals a novel type of eukaryotic DNA methyltransferase structure. *Cell.* 17 oct 1997;91(2):281-90.
12. Freitag M, Williams RL, Kothe GO, Selker EU. A cytosine methyltransferase homologue is essential for repeat-induced point mutation in *Neurospora crassa*. *Proc Natl Acad Sci U S A.* 25 juin 2002;99(13):8802-7.
13. Huff JT, Zilberman D. Dnmt1-independent CG methylation contributes to nucleosome positioning in diverse eukaryotes. *Cell.* 13 mars 2014;156(6):1286-97.

- 911 14. Bewick AJ, Hofmeister BT, Powers RA, Mondo SJ, Grigoriev IV, James TY, et al.  
912 Diversity of cytosine methylation across the fungal tree of life. *Nat Ecol Evol.* 18 févr 2019;
- 913 15. Goll MG, Kirpekar F, Maggert KA, Yoder JA, Hsieh C-L, Zhang X, et al. Methylation of  
914 tRNA<sup>Asp</sup> by the DNA methyltransferase homolog Dnmt2. *Science.* 20 janv  
915 2006;311(5759):395-8.
- 916 16. Katoh M, Curk T, Xu Q, Zupan B, Kuspa A, Shaulsky G. Developmentally regulated  
917 DNA methylation in *Dictyostelium discoideum*. *Eukaryot Cell.* janv 2006;5(1):18-25.
- 918 17. Lyko F, Whittaker AJ, Orr-Weaver TL, Jaenisch R. The putative *Drosophila*  
919 methyltransferase gene dDnmt2 is contained in a transposon-like element and is expressed  
920 specifically in ovaries. *Mech Dev.* juill 2000;95(1-2):215-7.
- 921 18. Lee DW, Freitag M, Selker EU, Aramayo R. A cytosine methyltransferase homologue is  
922 essential for sexual development in *Aspergillus nidulans*. *PloS One.* 2008;3(6):e2531.
- 923 19. Mishra PK, Baum M, Carbon J. DNA methylation regulates phenotype-dependent  
924 transcriptional activity in *Candida albicans*. *Proc Natl Acad Sci U S A.* 19 juill  
925 2011;108(29):11965-70.
- 926 20. Tang Y, Gao X-D, Wang Y, Yuan B-F, Feng Y-Q. Widespread existence of cytosine  
927 methylation in yeast DNA measured by gas chromatography/mass spectrometry. *Anal Chem.*  
928 21 août 2012;84(16):7249-55.
- 929 21. Panning B, Jaenisch R. DNA hypomethylation can activate Xist expression and silence  
930 X-linked genes. *Genes Dev.* 15 août 1996;10(16):1991-2002.
- 931 22. Li E, Bestor TH, Jaenisch R. Targeted mutation of the DNA methyltransferase gene  
932 results in embryonic lethality. *Cell.* 12 juin 1992;69(6):915-26.
- 933 23. Ronemus MJ, Galbiati M, Ticknor C, Chen J, Dellaporta SL. Demethylation-induced  
934 developmental pleiotropy in *Arabidopsis*. *Science.* 2 août 1996;273(5275):654-7.
- 935 24. Finnegan EJ, Peacock WJ, Dennis ES. Reduced DNA methylation in *Arabidopsis*  
936 *thaliana* results in abnormal plant development. *Proc Natl Acad Sci U S A.* 6 août  
937 1996;93(16):8449-54.
- 938 25. Selker EU, Stevens JN. Signal for DNA methylation associated with tandem  
939 duplication in *Neurospora crassa*. *Mol Cell Biol.* mars 1987;7(3):1032-8.
- 940 26. Hane, Williams, Taranto, Solomon, Oliver. Repeat-Induced Point Mutation in Fungi: A  
941 Fungal-Specific Endogenous Mutagenesis Process. In: Genetic Transformation Systems in  
942 Fungi. Verlag: Springer; 2015. p. 55-68.
- 943 27. Cambareri EB, Jensen BC, Schabtach E, Selker EU. Repeat-induced G-C to A-T

- 944 mutations in *Neurospora*. *Science*. 30 juin 1989;244(4912):1571-5.
- 945 28. Gladyshev E, Kleckner N. Direct recognition of homology between double helices of  
946 DNA in *Neurospora crassa*. *Nat Commun*. 3 avr 2014;5:3509.
- 947 29. Gladyshev E, Kleckner N. DNA sequence homology induces cytosine-to-thymine  
948 mutation by a heterochromatin-related pathway in *Neurospora*. *Nat Genet*. juin  
949 2017;49(6):887-94.
- 950 30. Rhounim L, Rossignol JL, Faugeron G. Epimutation of repeated genes in *Ascobolus*  
951 *immersus*. *EMBO J*. déc 1992;11(12):4451-7.
- 952 31. Li W-C, Chen C-L, Wang T-F. Repeat-induced point (RIP) mutation in the industrial  
953 workhorse fungus *Trichoderma reesei*. *Appl Microbiol Biotechnol*. 8 janv 2018;
- 954 32. Gladyshev E. Repeat-Induced Point Mutation and Other Genome Defense  
955 Mechanisms in Fungi. *Microbiol Spectr*. juill 2017;5(4).
- 956 33. Bouhouche K, Zickler D, Debuchy R, Arnaise S. Altering a gene involved in nuclear  
957 distribution increases the repeat-induced point mutation process in the fungus *Podospora*  
958 *anserina*. *Genetics*. mai 2004;167(1):151-9.
- 959 34. Graia F, Berteaux-Lecellier V, Zickler D, Picard M. *ami1*, an orthologue of the  
960 *Aspergillus nidulans* *apsA* gene, is involved in nuclear migration events throughout the life  
961 cycle of *Podospora anserina*. *Genetics*. juin 2000;155(2):633-46.
- 962 35. Espagne E, Lespinet O, Malagnac F, Da Silva C, Jaillon O, Porcel BM, et al. The genome  
963 sequence of the model ascomycete fungus *Podospora anserina*. *Genome Biol*.  
964 2008;9(5):R77.
- 965 36. Silar P, Dauget J-M, Gautier V, Grognet P, Chablat M, Hermann-Le Denmat S, et al. A  
966 gene graveyard in the genome of the fungus *Podospora comata*. *Mol Genet Genomics MGG*.  
967 4 oct 2018;
- 968 37. Peraza-Reyes L, Malagnac F. Sexual Development in Fungi. Springer; 2016. 524 p.  
969 (The Mycota I, Growth, Differentiation and Sexuality).
- 970 38. Coppin E, Arnaise S, Contamine V, Picard M. Deletion of the mating-type sequences in  
971 *Podospora anserina* abolishes mating without affecting vegetative functions and sexual  
972 differentiation. *Mol Gen Genet MGG*. nov 1993;241(3-4):409-14.
- 973 39. Jamet-Vierny C, Debuchy R, Prigent M, Silar P. IDC1, a pezizomycotina-specific gene  
974 that belongs to the PaMpk1 MAP kinase transduction cascade of the filamentous fungus  
975 *Podospora anserina*. *Fungal Genet Biol FG B*. déc 2007;44(12):1219-30.
- 976 40. Silar P. Grafting as a method for studying development in the filamentous fungus



977 *Podospora anserina*. Fungal Biol. août 2011;115(8):793-802.

978 41. Silar P, Picard M. Increased longevity of EF-1 alpha high-fidelity mutants in *Podospora*  
979 *anserina*. J Mol Biol. 7 janv 1994;235(1):231-6.

980 42. Bestor TH, Verdine GL. DNA methyltransferases. Curr Opin Cell Biol. juin  
981 1994;6(3):380-9.

982 43. Espagne E, Vasnier C, Storlazzi A, Kleckner NE, Silar P, Zickler D, et al. Sme4 coiled-coil  
983 protein mediates synaptonemal complex assembly, recombinosome relocalization, and  
984 spindle pole body morphogenesis. Proc Natl Acad Sci U S A. 28 juin 2011;108(26):10614-9.

985 44. Alnuami AA, Zeedi B, Qadri SM, Ashraf SS. Oxyradical-induced GFP damage and loss  
986 of fluorescence. Int J Biol Macromol. 15 août 2008;43(2):182-6.

987 45. Roberts TM, Rudolf F, Meyer A, Pellaux R, Whitehead E, Panke S, et al. Identification  
988 and Characterisation of a pH-stable GFP. Sci Rep. 21 2016;6:28166.

989 46. Bidard F, Imbeaud S, Reymond N, Lespinet O, Silar P, Clave C, et al. A general  
990 framework for optimization of probes for gene expression microarray and its application to  
991 the fungus *Podospora anserina*. 2010;3(1):171.

992 47. Ruepp A, Zollner A, Maier D, Albermann K, Hani J, Mokrejs M, et al. The FunCat, a  
993 functional annotation scheme for systematic classification of proteins from whole genomes.  
994 Nucleic Acids Res. 2004;32(18):5539-45.

995 48. Bidard F, Aït Benkhali J, Coppin E, Imbeaud S, Grognet P, Delacroix H, et al. Genome-  
996 wide gene expression profiling of fertilization competent mycelium in opposite mating types  
997 in the heterothallic fungus *Podospora anserina*. PloS One. 2011;6(6):e21476.

998 49. Dyer PS, Inderbitzin P, Debuchy R. Mating-Type Structure, Function, Regulation and  
999 Evolution in the Pezizomycotina. In: Growth, Differentiation and Sexuality. Third. Springer  
1000 International Publishing; 2016. p. 351-85. (Mycota).

1001 50. Colot HV, Park G, Turner GE, Ringelberg C, Crew CM, Litvinkova L, et al. A high-  
1002 throughput gene knockout procedure for *Neurospora* reveals functions for multiple  
1003 transcription factors. Proc Natl Acad Sci U S A. 5 juill 2006;103(27):10352-7.

1004 51. Carrillo AJ, Schacht P, Cabrera IE, Blahut J, Prudhomme L, Dietrich S, et al. Functional  
1005 Profiling of Transcription Factor Genes in *Neurospora crassa*. G3 Genes Genomes Genet. 1  
1006 sept 2017;7(9):2945-56.

1007 52. Hagiwara D, Kondo A, Fujioka T, Abe K. Functional analysis of C2H2 zinc finger  
1008 transcription factor CrzA involved in calcium signaling in *Aspergillus nidulans*. Curr Genet.  
1009 déc 2008;54(6):325-38.

- 1010 53. Han KH, Han KY, Yu JH, Chae KS, Jahng KY, Han DM. The nsdD gene encodes a  
1011 putative GATA-type transcription factor necessary for sexual development of *Aspergillus*  
1012 *nidulans*. Mol Microbiol. juill 2001;41(2):299-309.
- 1013 54. Aramayo R, Metzenberg RL. Meiotic transvection in fungi. Cell. 12 juill  
1014 1996;86(1):103-13.
- 1015 55. Feng B, Haas H, Marzluf GA. ASD4, a new GATA factor of *Neurospora crassa*, displays  
1016 sequence-specific DNA binding and functions in ascus and ascospore development.  
1017 Biochemistry. 12 sept 2000;39(36):11065-73.
- 1018 56. Li D, Bobrowicz P, Wilkinson HH, Ebbole DJ. A mitogen-activated protein kinase  
1019 pathway essential for mating and contributing to vegetative growth in *Neurospora crassa*.  
1020 Genetics. juill 2005;170(3):1091-104.
- 1021 57. McCluskey K, Wiest AE, Grigoriev IV, Lipzen A, Martin J, Schackwitz W, et al.  
1022 Rediscovery by Whole Genome Sequencing: Classical Mutations and Genome  
1023 Polymorphisms in *Neurospora crassa*. G3 GenesGenomesGenetics. 1 sept 2011;1(4):303-16.
- 1024 58. Xie N, Ruprich-Robert G, Chapeland-Leclerc F, Coppin E, Lalucque H, Brun S, et al.  
1025 Inositol-phosphate signaling as mediator for growth and sexual reproduction in *Podospora*  
1026 *anserina*. Dev Biol. 01 2017;429(1):285-305.
- 1027 59. Teichert I, Nowrousian M, Pöggeler S, Kück U. Chapter Four - The Filamentous Fungus  
1028 *Sordaria macrospora* as a Genetic Model to Study Fruiting Body Development. In: Friedmann  
1029 T, Dunlap JC, Goodwin SF, éditeurs. Advances in Genetics [Internet]. Academic Press; 2014  
1030 [cité 10 févr 2019]. p. 199-244. Disponible sur:  
1031 <http://www.sciencedirect.com/science/article/pii/B9780128001493000044>
- 1032 60. Peraza Reyes L, Berteaux-Lecellier V. Peroxisomes and sexual development in fungi.  
1033 Front Physiol [Internet]. 2013 [cité 14 juill 2018];4.  
1034 <https://www.frontiersin.org/articles/10.3389/fphys.2013.00244/full>
- 1035 61. Li S, Myung K, Guse D, Donkin B, Proctor RH, Grayburn WS, et al. FvVE1 regulates  
1036 filamentous growth, the ratio of microconidia to macroconidia and cell wall formation in  
1037 *Fusarium verticillioides*. Mol Microbiol. déc 2006;62(5):1418-32.
- 1038 62. Calvo AM, Bok J, Brooks W, Keller NP. veA is required for toxin and sclerotial  
1039 production in *Aspergillus parasiticus*. Appl Environ Microbiol. août 2004;70(8):4733-9.
- 1040 63. Karimi Aghchegh R, Németh Z, Atanasova L, Fekete E, Paholcsek M, Sándor E, et al. The  
1041 VELVET A orthologue VEL1 of *Trichoderma reesei* regulates fungal development and is  
1042 essential for cellulase gene expression. PloS One. 2014;9(11):e112799.
- 1043 64. Kim J-E, Kim S-J, Lee B-H, Park R-W, Kim K-S, Kim I-S. Identification of Motifs for Cell  
1044 Adhesion within the Repeated Domains of Transforming Growth Factor- $\beta$ -induced Gene, $\beta$ ig-

- 1045 h3. J Biol Chem. 10 juin 2000;275(40):30907-15.
- 1046 65. Greenwald CJ, Kasuga T, Glass NL, Shaw BD, Ebbole DJ, Wilkinson HH. Temporal and  
1047 spatial regulation of gene expression during asexual development of *Neurospora crassa*.  
1048 Genetics. déc 2010;186(4):1217-30.
- 1049 66. Wang Y, Reddy B, Thompson J, Wang H, Noma K, Yates JR, et al. Regulation of Set9-  
1050 mediated H4K20 methylation by a PWWP domain protein. Mol Cell. 27 févr  
1051 2009;33(4):428-37.
- 1052 67. Harari Y, Rubinstein L, Kupiec M. An anti-checkpoint activity for rif1. PLoS Genet. déc  
1053 2011;7(12):e1002421.
- 1054 68. Glass NL, Kaneko I. Fatal Attraction: Nonself Recognition and Heterokaryon  
1055 Incompatibility in Filamentous Fungi. Eukaryot Cell. févr 2003;2(1):1-8.
- 1056 69. Goddard MR, Godfray HCJ, Burt A. Sex increases the efficacy of natural selection in  
1057 experimental yeast populations. Nature. 31 mars 2005;434(7033):636-40.
- 1058 70. Judson OP, Normark BB. Ancient asexual scandals. Trends Ecol Evol. févr  
1059 1996;11(2):41-6.
- 1060 71. Bruggeman J, Debets AJM, Wijngaarden PJ, deVisser JAGM, Hoekstra RF. Sex slows  
1061 down the accumulation of deleterious mutations in the homothallic fungus *Aspergillus*  
1062 *nidulans*. Genetics. juin 2003;164(2):479-85.
- 1063 72. Coleman JJ, Rounsley SD, Rodriguez-Carres M, Kuo A, Wasmann CC, Grimwood J, et  
1064 al. The genome of *Nectria haematococca*: contribution of supernumerary chromosomes to  
1065 gene expansion. PLoS Genet. août 2009;5(8):e1000618.
- 1066 73. Becks L, Agrawal AF. The evolution of sex is favoured during adaptation to new  
1067 environments. PLoS Biol. 2012;10(5):e1001317.
- 1068 74. Okano M, Bell DW, Haber DA, Li E. DNA methyltransferases Dnmt3a and Dnmt3b are  
1069 essential for de novo methylation and mammalian development. Cell. 29 oct  
1070 1999;99(3):247-57.
- 1071 75. Malagnac F, Lalucque H, Lepère G, Silar P. Two NADPH oxidase isoforms are required  
1072 for sexual reproduction and ascospore germination in the filamentous fungus *Podospora*  
1073 *anserina*. Fungal Genet Biol FG B. nov 2004;41(11):982-97.
- 1074 76. Lalucque H, Malagnac F, Brun S, Kicka S, Silar P. A non-Mendelian MAPK-generated  
1075 hereditary unit controlled by a second MAPK pathway in *Podospora anserina*. Genetics. juin  
1076 2012;191(2):419-33.
- 1077 77. Ait Benkhali J, Coppin E, Brun S, Peraza-Reyes L, Martin T, Dixelius C, et al. A network

- 1078 of HMG-box transcription factors regulates sexual cycle in the fungus *Podospora anserina*.  
1079 PLoS Genet. 2013;9(7):e1003642.
- 1080 78. Arnais S, Zickler D, Le Bilot S, Poissier C, Debuchy R. Mutations in mating-type genes  
1081 of the heterothallic fungus *Podospora anserina* lead to self-fertility. Genetics. oct  
1082 2001;159(2):545-56.
- 1083 79. Turgeon BG, Yoder OC. Proposed nomenclature for mating type genes of filamentous  
1084 ascomycetes. Fungal Genet Biol FG B. oct 2000;31(1):1-5.
- 1085 80. Zheng Q, Hou R, Juanyu null, Zhang null, Ma J, Wu Z, et al. The MAT locus genes play  
1086 different roles in sexual reproduction and pathogenesis in *Fusarium graminearum*. PloS One.  
1087 2013;8(6):e66980.
- 1088 81. Klix V, Nowrousian M, Ringelberg C, Loros JJ, Dunlap JC, Pöggeler S. Functional  
1089 characterization of MAT1-1-specific mating-type genes in the homothallic ascomycete  
1090 *Sordaria macrospora* provides new insights into essential and nonessential sexual regulators.  
1091 Eukaryot Cell. juin 2010;9(6):894-905.
- 1092 82. Arnais S, Debuchy R, Picard M. What is a bona fide mating-type gene? Internuclear  
1093 complementation of mat mutants in *Podospora anserina*. Mol Gen Genet MGG. sept  
1094 1997;256(2):169-78.
- 1095 83. Turgeon BG, Debuchy R. Cochliobolus and Podospora: mechanism of sex  
1096 determination and the evolution of reproductive lifestyle. In: Sex in Fungi, Molecular  
1097 Determination and Evolutionary Implications. 2007.
- 1098 84. Berteaux-Lecellier V, Zickler D, Debuchy R, Panvier-Adoutte A, Thompson-Coffe C,  
1099 Picard M. A homologue of the yeast SHE4 gene is essential for the transition between the  
1100 syncytial and cellular stages during sexual reproduction of the fungus *Podospora anserina*.  
1101 EMBO J. 10 août 1998;17(5):1248-58.
- 1102 85. Lewis ZA, Adhvaryu KK, Honda S, Shiver AL, Knip M, Sack R, et al. DNA methylation  
1103 and normal chromosome behavior in Neurospora depend on five components of a histone  
1104 methyltransferase complex, DCDC. PLoS Genet. 2010;6(11):e1001196.
- 1105 86. Kück U, Beier AM, Teichert I. The composition and function of the striatin-interacting  
1106 phosphatases and kinases (STRIPAK) complex in fungi. Fungal Genet Biol FG B. mai  
1107 2016;90:31-8.
- 1108 87. Yang K, Liang L, Ran F, Liu Y, Li Z, Lan H, et al. The DmtA methyltransferase  
1109 contributes to *Aspergillus flavus* conidiation, sclerotial production, aflatoxin biosynthesis and  
1110 virulence. Sci Rep. 16 mars 2016;6:23259.
- 1111 88. So K-K, Ko Y-H, Chun J, Bal J, Jeon J, Kim J-M, et al. Global DNA Methylation in the  
1112 Chestnut Blight Fungus *Cryphonectria parasitica* and Genome-Wide Changes in DNA

1113 Methylation Accompanied with Sectorization. Front Plant Sci [Internet]. 2 févr 2018 [cité 7  
1114 oct 2018];9. Disponible sur: <https://www.ncbi.nlm.nih.gov/pmc/articles/PMC5801561/>

1115 89. Wang Y, Wang T, Qiao L, Zhu J, Fan J, Zhang T, et al. DNA methyltransferases  
1116 contribute to the fungal development, stress tolerance and virulence of the  
1117 entomopathogenic fungus *Metarhizium robertsii*. Appl Microbiol Biotechnol. mai  
1118 2017;101(10):4215-26.

1119 90. Jeon J, Choi J, Lee G-W, Park S-Y, Huh A, Dean RA, et al. Genome-wide profiling of  
1120 DNA methylation provides insights into epigenetic regulation of fungal development in a  
1121 plant pathogenic fungus, *Magnaporthe oryzae*. Sci Rep. 24 févr 2015;5:8567.

1122 91. Shiu PK, Raju NB, Zickler D, Metzenberg RL. Meiotic silencing by unpaired DNA. Cell.  
1123 28 déc 2001;107(7):905-16.

1124 92. Keller C, Bühler M. Chromatin-associated ncRNA activities. Chromosome Res.  
1125 2013;21(6-7):627-41.

1126 93. Taylor DH, Chu ET-J, Spektor R, Soloway PD. Long Non-Coding RNA Regulation of  
1127 Reproduction and Development. Mol Reprod Dev. déc 2015;82(12):932-56.

1128 94. Ezhkova E, Tansey WP. Proteasomal ATPases link ubiquitylation of histone H2B to  
1129 methylation of histone H3. Mol Cell. 13 févr 2004;13(3):435-42.

1130 95. Köhler A, Schneider M, Cabal GG, Nehrbass U, Hurt E. Yeast Ataxin-7 links histone  
1131 deubiquitination with gene gating and mRNA export. Nat Cell Biol. juin 2008;10(6):707-15.

1132 96. van der Lee R, Lang B, Kruse K, Gsponer J, Sánchez de Groot N, Huynen MA, et al.  
1133 Intrinsically Disordered Segments Affect Protein Half-Life in the Cell and during Evolution.  
1134 Cell Rep. 15 sept 2014;8(6):1832-44.

1135 97. Collins GA, Goldberg AL. The Logic of the 26S Proteasome. Cell. 18 mai  
1136 2017;169(5):792-806.

1137 98. Amselem J, Lebrun M-H, Quesneville H. Whole genome comparative analysis of  
1138 transposable elements provides new insight into mechanisms of their inactivation in fungal  
1139 genomes. BMC Genomics. déc 2015;16(1):141.

1140 99. Ikeda K, Van Vu B, Kadotani N, Tanaka M, Murata T, Shiina K, et al. Is the fungus  
1141 *Magnaporthe* losing DNA methylation? Genetics. nov 2013;195(3):845-55.

1142 100. Clancy MJ, Shambaugh ME, Timpert CS, Bokar JA. Induction of sporulation in  
1143 *Saccharomyces cerevisiae* leads to the formation of N6-methyladenosine in mRNA: a  
1144 potential mechanism for the activity of the IME4 gene. Nucleic Acids Res. 15 oct  
1145 2002;30(20):4509-18.

- 1146 101. Zhong S, Li H, Bodi Z, Button J, Vespa L, Herzog M, et al. MTA is an Arabidopsis  
1147 messenger RNA adenosine methylase and interacts with a homolog of a sex-specific splicing  
1148 factor. *Plant Cell*. mai 2008;20(5):1278-88.
- 1149 102. Grognet P, Bidard F, Kuchly C, Tong LCH, Coppin E, Benkhali JA, et al. Maintaining two  
1150 mating types: structure of the mating type locus and its role in heterokaryosis in *Podospora*  
1151 *anserina*. *Genetics*. mai 2014;197(1):421-32.
- 1152 103. Rizet G, Engelmann C. Contribution à l'étude génétique d'un Ascomycète tétrasporé:  
1153 *Podospora anserina*. *Rev Cytol Biol Veg*. 1949;11:201-304.
- 1154 104. Lambou K, Malagnac F, Barbisan C, Tharreau D, Lebrun M-H, Silar P. The crucial role  
1155 of the Pls1 tetraspanin during ascospore germination in *Podospora anserina* provides an  
1156 example of the convergent evolution of morphogenetic processes in fungal plant pathogens  
1157 and saprobes. *Eukaryot Cell*. oct 2008;7(10):1809-18.
- 1158 105. Ausubel F, Brent R, Kingston R, Moore D, Seidman J, Smith J, et al. Current protocols  
1159 in molecular biology. Wiley Interscience. New York; 1987.
- 1160 106. Lecellier G, Silar P. Rapid methods for nucleic acids extraction from Petri dish-grown  
1161 mycelia. *Curr Genet*. févr 1994;25(2):122-3.
- 1162 107. Brygoo Y, Debuchy R. Transformation by integration in *Podospora anserina*. I.  
1163 Methodology and phenomenology. *Mol Gen Genet*. 1985;200:128-31.
- 1164 108. Altschul SF, Gish W, Miller W, Myers EW, Lipman DJ. Basic local alignment search  
1165 tool. *J Mol Biol*. 5 oct 1990;215(3):403-10.
- 1166 109. Grognet P, Lalucque H, Silar P. The PaAlr1 magnesium transporter is required for  
1167 ascospore development in *Podospora anserina*. *Fungal Biol*. oct 2012;116(10):1111-8.
- 1168 110. Silar P. Two new easy-to-use vectors for transformations. *Fungal Genet Newsl*.  
1169 1995;42:73.
- 1170 111. Kicka S, Bonnet C, Sobering AK, Ganesan LP, Silar P. A mitotically inheritable unit  
1171 containing a MAP kinase module. *Proc Natl Acad Sci U S A*. 5 sept 2006;103(36):13445-50.
- 1172 112. Berteaux-Lecellier V, Picard M, Thompson-Coffe C, Zickler D, Panvier-Adoutte A,  
1173 Simonet JM. A nonmammalian homolog of the PAF1 gene (Zellweger syndrome) discovered  
1174 as a gene involved in caryogamy in the fungus *Podospora anserina*. *Cell*. 30 juin  
1175 1995;81(7):1043-51.
- 1176 113. Grossetête S, Labedan B, Lespinet O. FUNGIpath: a tool to assess fungal metabolic  
1177 pathways predicted by orthology. *BMC Genomics*. 1 févr 2010;11:81.
- 1178 114. Grigoriev IV, Nikitin R, Haridas S, Kuo A, Ohm R, Otillar R, et al. MycoCosm portal:

1179 gearing up for 1000 fungal genomes. Nucleic Acids Res. janv 2014;42(Database issue):D699-  
1180 704.

1181 115. Guindon S, Dufayard J-F, Lefort V, Anisimova M, Hordijk W, Gascuel O. New  
1182 algorithms and methods to estimate maximum-likelihood phylogenies: assessing the  
1183 performance of PhyML 3.0. Syst Biol. mai 2010;59(3):307-21.

1184 116. Bidard F, Clavé C, Saupe SJ. The transcriptional response to nonself in the fungus  
1185 *Podospora anserina*. G3 Bethesda Md. 21 juin 2013;3(6):1015-30.

1186 117. Marisa L, Ichanté J-L, Reymond N, Aggerbeck L, Delacroix H, Mucchielli-Giorgi M-H.  
1187 MAnGO: an interactive R-based tool for two-colour microarray analysis. Bioinforma Oxf Engl.  
1188 1 sept 2007;23(17):2339-41.

1189 118. Benjamini Y, Hochberg Y. Controlling the false discovery rate: a practical and  
1190 powerful approach to multiple testing. J R Stat Soc Ser B Stat Methodol. 1995;57:289-300.

1191 119. Boyle EI, Weng S, Gollub J, Jin H, Botstein D, Cherry JM, et al. GO::TermFinder--open  
1192 source software for accessing Gene Ontology information and finding significantly enriched  
1193 Gene Ontology terms associated with a list of genes. Bioinforma Oxf Engl. 12 déc  
1194 2004;20(18):3710-5.

1195

1196



# Figure legends

## Fig 1. Structure and Phylogenetic analysis of DNA methyltransferases proteins. (A)

Domain architecture of *P. anserina* putative DNA methyltransferase PaRid. The catalytic domains contain 10 conserved motifs (I - X) and a target recognition domain (TRD) located between the motifs VIII and IX. The amino acid length is indicated. (B) Domain architecture of DNA methyltransferase proteins. The functional domain analysis was performed using InterProScan and visualized using IBS. *Mus musculus*: MmDnmt1 (AAH53047.1), MmDnmt2 (AAC40130.1), MmDnmt3 (AAF73868.1); *Ascobolus immersus*, AiMasc1 (AAC49849.1), AiMasc3; *Aspergillus nidulans* AnDmtA (AAO37378.1), *Neurospora crassa* NcRid (AAM27415.1), NcDim2 (AAK49954.1); *Podospira anserina* PaRid, PaDim2; *Trichoderma reesei* TrRid (AEM66210.1), TrDim2 (XP\_006964860.1). Cytosine-specific DNA methyltransferase domains: PF00145, PR00105, PS51679, PS00095, PS00094; protein-DNA interaction domains: bromo-associated homology (BAH) domain PS51038, Replication foci targeting sequence (RFTS) PF12047, Zinc finger motif (CXXC) PS51058, PWWP domain (PF00855). Because its sequence is too divergent, PaDnmt5 (Pa\_4\_2960) was not included. (C) Phylogenetic analysis of mammal, plant and fungal DNA methyltransferases. The maximum likelihood tree resolved five groups i) the Dnmt1/Met1/CMT group (orange), ii) the Dnmt2, group (black) iii) the Dnmt3/DRM group (red) iv) the fungal Dim2-like group (purple) and v) the fungal-specific Rid-like group (green), vi) the DNMT5 group (blue). *Haemophilus aegyptius* (HaeMTase: WP\_006996493.1) *Arabidopsis thaliana* (ArathMet1: NP\_199727.1; ArathCMT2: NP\_193637.2; ArathCMT3: NP\_177135.1; ArathDRM1: NP\_197042.2; ArathDRM2: NP\_196966.2), *Ascobolus immersus* (AscimMasc3: CE37440\_11164; AscimMasc1: AAC49849.1; AscimDnmt5: RPA73956.1), *Aspergillus nidulans* (AspniDmtA: XP\_664242.1, AspniDnmt5: XP\_663680.1), *Botrytis cinerea* (BotciDim2: XP\_024553164.1; BotciRid: XP\_024550989.1, BotciDnmt5: XP\_024550790.1), *Cenococcum geophilum* (CengeDim2: OCK96497.1; CengeRid: OCK89234.1), *Coccidioides immitis* (CocimDim2: XP\_001247991.2; CocimRid: XP\_001239116.2; CocimDnmt5:

1224 XP\_001247253.2) *Epichloe festucae* (EpifeDim2: annotated in this study; EpifeRid:  
1225 AGF87103.1), *Fusarium graminearum* (FusgrDim2: EYB34029.1; FusgrRid:  
1226 XP\_011320094.1) *Pseudogymnoascus destructans* (GeodeDim2: XP\_024321957.1;  
1227 GeodeRid: XP\_024328520.1; GeodeDnmt5: XP\_024320712.1) *Magnaporthe grisea*  
1228 (MaggrDim2: XP\_003718076.1; MaggrRid: XP\_003720946.1) *Mus musculus* (MusmuDnmt1:  
1229 NP\_001300940.1; MusmuDnmt3A: NP\_031898.1; MusmuDnmt3B: NP\_001003961.2,  
1230 MusmuDnmt2: NP\_034197.3), *Neurospora crassa* (NeucrDim2 : XP\_959891.1; NeucrRid :  
1231 AAM27408.1), *Penicillium chrysogenum* (PenchRid: XP\_002563814.1; PenchDnmt5:  
1232 XP\_002561360.1), *Podospira anserina* (PodanDim2: Pa\_5\_9100; PodanRid: Pa\_1\_19440;  
1233 PodanDnmt5: Pa\_4\_2960), *Pyronema confluens* (Pyrco1dim2: PCON\_02009m.01;  
1234 Pyrco2dim2: PCON\_01959m.01, PircoRid: PCON\_06255m.01; PyrcoDnmt5: CCX08765.1),  
1235 *Schizosaccharomyces pombe* (SchpoDnmt2 : NP\_595687.1), *Thielavia terrestris* (ThiteDim2:  
1236 XP\_003654318.1; ThiteRid: XP\_003651414.1; ThiteDnmt5: XP\_003650845.1), *Trichoderma*  
1237 *reesei* (TrireDim2 XP\_006964860.1; TrireRid: AEM66210.1), *Trichophyton rubrum*  
1238 (TriruDim2: XP\_003239082.1; TriruRid: XP\_003239287.1; TriruDnmt5: XP\_003236242.1),  
1239 *Tuber melanosporum* (TubmeDim2: XP\_002837027.1; TubmeRid: XP\_002842459.1;  
1240 TubmeDnmt5: XP\_002837747.1). (D) Comparison of the amino acid sequence of the  
1241 catalytic motifs IV and VI. A key catalytic step is the nucleophilic attack of the DNA  
1242 methyltransferases on the sixth carbon of the target cytosine. This attack is made by the  
1243 cysteine residue (red arrow) of the conserved PCQ triad (motif IV). This reaction is catalyzed  
1244 by protonation of the N3 position of the cytosine by the glutamate residue of the conserved  
1245 ENV triad (motif VI). In the Masc1/Rid-like group of enzymes, the ENV triad is replaced by  
1246 either the EQT triad (e.g. *N. crassa* Rid, *A. immersus* Masc1, *P. anserina* Rid, etc.) or the  
1247 EET triad (e.g. *B. cinerea* Rid, *P. destructans* Rid, etc.). At: *Arabidopsis thaliana*, Mm: *Mus*  
1248 *musculus*, Cg: *Cenococcum geophilum*, Mg: *Magnaporthe grisea*, Tr: *Trichoderma reesei*,  
1249 Fg: *Fusarium graminearum*, Nc: *Neurospora crassa*, Pa: *Podospira anserina*, Gd:  
1250 *Pseudogymnoascus destructans*, Bc: *Botrytis cinerea*, Ci: *Coccidioides immitis*. Ai:

*Ascobolus immersus*, Tm: *Tuber melanosporum*, An: *Aspergillus nidulans*. See above for accession numbers of the corresponding proteins.

**Fig 2. PaRid is essential to complete fruiting body development and to produce ascospores.** (A) Homozygous crosses of wild type S strains (left panel) and of  $\Delta PaRid$  strains (right panel) on M2 medium after 5 days at 27°C. Each dark dot is one fruiting body resulting from one event of fertilization. The homozygous  $\Delta PaRid$  cross forms reduced-size fruiting bodies only (right panel). (B) Close up of fruiting bodies (perithecia) originating from either a wild-type genetic background (left panel) or a  $\Delta PaRid$  genetic background (right panel). Scale bar: 250  $\mu$ m. (C) After 4 days of growth at 27°C, the wild type fruiting bodies start to produce ascospores (left panel) while the mutant micro-perithecia are barren (right panel). Scale bar: 50  $\mu$ m. (D) Fluorescence microscopy pictures of 48h-old fruiting body content from homozygous crosses of wild type S strains (left panel) and of  $\Delta PaRid$  strains (right panel), performed on M2 medium at 27°C. The nuclei are visualized thanks to histone H1-GFP fusion protein. Croziers are readily formed inside the wild type perithecia (left panel, white arrows) while no crozier but large plurinucleate ascogonial cells only are seen inside the  $\Delta PaRid$  perithecia. Scale bar: 10  $\mu$ m.

**Fig 3. Expression and subcellular localization of PaRid during *P. anserina* life cycle.** PaRid-GFP expression was assayed from a  $\Delta PaRid$ :AS4-*PaRid*-GFP-HA strain showing wild type phenotypes. No GFP signal can be observed in mycelium, however, a significant and specific GFP signal can be found in ascogonia (A, white arrows are pointing at ascogonia) and protoperithecia (B). Surprisingly, no GFP signal is observed in the croziers (C, white arrows are pointing at croziers) but a strong signal can be noticed in the mature ascospores (D, white arrows are pointing at the nuclei of one ascospore), showing both a nuclear and cytoplasmic localization of PaRid. From left to right: bright-field (pol), DAPI staining, GFP channel and merge of the two latest. Scale bar: 1,5  $\mu$ m (A and B), 5  $\mu$ m (C and D).

**Fig 4. Transcriptomic analysis experimental design and data.** (A) Schematic developmental time course from fertilization to ascospore maturation. Total RNA was extracted from wild-type perithecia at T24 and T30 (open circles) and from  $\Delta PaRid$  micro-perithecia at T42 (solid circle); Dotted line: time frame during which the  $\Delta PaRid$  developmental blockage might occur. Light microphotographs of the upper panel illustrate the various developmental steps indicated along the time course. (B) Functional categories in the down- and up-regulated CDS sets. Legend of pie charts corresponds to the FunCat categories, see Table 2 for details. Stars mark significantly enriched functional categories (p-value < 0.05). (C) Venn diagram of PaRid and FPR1 targets.

**Fig 5. Schematic representation of PaRid & FPR1 developmental pathways during sexual development.** FPR1, a MAT $\alpha$ -HMG transcription factor is essential to fertilization and development of fruiting bodies. This mating type protein can act either as an activator or as a repressor. This study established that PaRid shares part of the FPR1 positive regulatory circuit, which is at work after fertilization to build the fructification and to form the dikaryotic cells. As the methyltransferase activity is required for PaRid function, we hypothesized that PaRid might repress a repressor. Solid black arrow is indicative of activation. Dashed T-line is indicative of repression. Solid grey arrow represents the sexual development time line.

## Supporting information

**S1 Fig. Pattern of expression of *PaRid*.** (A) Average expression profiles (y-axis) of *PaRid* (Pa\_1\_19440) during sexual development (x-axis, hours). (B) Amplification of *PaRid* transcripts (2296 bp) by RT-PCR. MW: GeneRuler DNA Ladder Mix (Thermo Fisher Scientific), RT T48, RT T96: RT-PCR performed on RNA extracted from 2 days or 4 days post fertilization developing perithecia, gDNA: genomic DNA, NRT: PCR performed on RNA extracted from 2 days or 4 days post fertilization developing perithecia, Neg: No RNA. See (Materials and methods section for details). (C) Coverage of RNA-seq mapped reads at the *PaRid* locus [36]. RNA-seq experiments were performed on RNA extracted from non-germinated ascospores (Ascospores), eight hours germinating ascospores (Germinated ascospores), 1-day- or 4-day-old mycelia, 2 days or 4 days post fertilization developing perithecia.

**S2 Fig. Molecular characterization of knock-out mutants by Southern-blot hybridization.** Schematic representations of the endogenous and disrupted loci are given in (S2A and S2B). Replacement by homologous recombination of the wild type *PaRid* allele by the disrupted  $\Delta PaRid$  allele results in the substitution of a 3.2 kb *Pst*I fragment by a 2.3 kb *Pst*I fragment as revealed by hybridization of the 5'UTR digoxigenin-labeled probe (S2A) and in the substitution of a 2.8 kb *Pst*I fragment by a 4.0 kb *Pst*I fragment as revealed by hybridization of the 3'UTR digoxigenin-labeled probe (S2A).

**S3 Fig. Major steps of *P. anserina*'s life cycle as shown by a schematic representation (upper panel) and the corresponding light microphotographs (lower panel).** *P. anserina*'s life cycle begins with the germination of an ascospore (A) that gives rise to a haploid mycelium (B). After three days of growth, both male gametes (spermatia, B, top) and female gametes (ascogonia, B, bottom) are formed. Because most of the ascospores carry two different and sexually compatible nuclei (*mat*<sup>+</sup> and *mat*<sup>-</sup> mating types) *P. anserina* strains are self-fertile (pseudo-homothallism). Before fertilization occurs, ascogonia can mature into

protoperithecia by recruiting protective maternal hyphae to shelter the ascogonial cell. A pheromone/receptor signaling system allows the ascogonia to recognize and fuse with spermatia of compatible mating type (heterothallism). Fertilization initiates the development of the fruiting body (perithecia, C) in which the dikaryotic *mat*<sup>+</sup>/*mat*<sup>-</sup> fertilized ascogonium forms. Further development leads to a three-celled hook-shaped structure called the crozier (D). The two parental nuclei in the middle cell of the crozier fuse (karyogamy, schematic representation D) to form a diploid nucleus, which then immediately undergoes meiosis. The four resulting haploid nuclei undergo mitosis. In most cases, ascospores are formed around 2 non-sister nuclei within the developing ascus. On rare occasions, two ascospores are formed around only one haploid nucleus each, leading to a five-ascospore ascus (E, photograph). Scale bar: 10  $\mu$ m in (A-D); 200  $\mu$ m in (E).

**S4 Fig. Morphological phenotype of  $\Delta$ *PaRid* and complemented  $\Delta$ *PaRid*:AS4-*PaRid*-HA strains during vegetative growth.** Strains were grown on M2 minimal medium for 6 days at 27°C. S: Wild-type strain. See Material and Methods section for details on the complemented  $\Delta$ *PaRid*:AS4:*PaRid*:HA strain.

**S5 Fig. Vegetative growth rates at various sub-optimal temperatures and longevity assays.** For each genotype, growth was assayed on 3 independent cultures after 4 days of growth at the indicated temperatures. Each experiment was performed three times. For each genotype, longevity was measured on three independent cultures, issued from three individual ascospores, as described in [41].

**S6 Fig. Perithecia versus micro-perithecia development with respect to genetic backgrounds.** (A) Morphological comparison of perithecia obtained from wild-type crosses (*PaRid*),  $\Delta$ *PaRid* crosses ( $\Delta$ *PaRid*) and  $\Delta$ *Smr1* crosses ( $\Delta$ *Smr1*). Size and morphology of the  $\Delta$ *PaRid* and  $\Delta$ *Smr1* perithecia are alike. Scale bar: 250  $\mu$ m. (B) Perithecia obtained in the indicated trikaryons on M2 medium after 5 days at 27°C. The  $\Delta$ *mat* ; *PaRid*<sup>+</sup> *mat*<sup>-</sup> ; *PaRid*<sup>+</sup> *mat*<sup>+</sup> trikaryons form typical fully developed perithecia (left panels). By contrast, only blocked

micro-perithecia are formed by the  $\Delta mat$  ;  $\Delta PaRid\ mat^-$  ;  $\Delta PaRid\ mat^+$  trikaryons (right panels). (C) Heterozygous orientated crosses  $PaRid^+ mat^- \times \Delta PaRid\ mat^+$  after 5 days at 27°C. When the wild-type  $PaRid^+$  allele is present in the female gametes genome and the mutant  $\Delta PaRid$  allele is present in the male gamete genome fully developed perithecia are formed, conversely when the mutant  $\Delta PaRid$  allele is present in the female gametes and the wild-type  $PaRid^+$  allele is present in the male gamete, only blocked micro-perithecia are formed. Left panel, scale bar: 1 mm, right panel, scale bar: 500  $\mu m$ .

**S7 Fig. Western immunoblot analysis of the HA-tagged PaRid proteins expressed from the various ectopic PaRid alleles.** Western-blot was performed as described in Material and Methods section and probed with an anti-HA antibody that specifically detects the HA-tagged proteins. The PaRid protein (85 kDa) was barely detectable when the expression of the ectopic alleles was driven from its native promoter ( $\Delta PaRid:PaRid$ ,  $\Delta PaRid:PaRid^{C403S}$ ). However, it was readily produced when the expression of the ectopic alleles was under the control of a strong and constitutive promoter ( $\Delta PaRid:AS4-PaRid$ ,  $\Delta PaRid:AS4-PaRid^{C403S}$ ). Complementation of the fertility defect was obtained by insertion of the wild type  $PaRid$ -HA allele or by insertion of the AS4- $PaRid$ -HA only.  $\Delta PaRid$  mutant strain (negative control),  $\Delta PaRid:PaRid = \Delta PaRid$  mutant strain harboring an ectopic wild type  $PaRid$ -HA allele (complemented strain),  $\Delta PaRid:AS4-PaRid = \Delta PaRid$  mutant strain harboring an ectopic AS4- $PaRid$ -HA allele (complemented strain),  $\Delta PaRid:PaRid^{C403S} = \Delta PaRid$  mutant strain harboring an ectopic catalytically dead  $PaRid^{C403S}$ -HA allele (non-complemented strain),  $\Delta PaRid:AS4-PaRid^{C403S} = \Delta PaRid$  mutant strain harboring an ectopic AS4- $PaRid^{C403S}$ -HA allele (non-complemented strain). See the material and method section for details on the alleles construction and features.

**S8 Fig. Phylogenetic analysis of *P. anserina* down-regulated CDS encoding transcription factors and their orthologs in *N. crassa*, *A. immersus* and *A. nidulans* when present, using a maximum likelihood tree.** If four out of 17 have orthologs in *A. nidulans*, *A. immersus* and *N. crassa* (Pa\_1\_17860, Pa\_1\_22930, Pa\_2\_740 and



1375 Pa\_2\_5020), Pa\_4\_1960 is the only TF of the set showing no orthologs into the genomes of  
1376 these three species. Although Pa\_1\_18880 and Pa\_7510 display orthologs either in  
1377 *N. crassa* or in *N. crassa* and *A. nidulans*, their phylogenetic positions were ambiguous,  
1378 suggesting some species specialization. See Table S6 for protein names. Only bootstrap  
1379 values > 0.5 are indicated on the corresponding branches.

1380 **S1 Table.** Primers used in this study.

1381 **S2 Table.** Vegetative phenotypic analyses.

1382 **S3 Table.** Sexual reproduction phenotypic analyses.

1383 **S4 Table.** Grafting experiments.

1384 **S5 Table.** List of DE CDS. DE DOWN: down-regulated CDS. DE UP: up-regulated CDS.

1385 DOWN FC max: list of CDS with maximum fold change higher than -5. UP FC max: list of  
1386 CDS with maximum fold change higher than +5. A: target of mating-type transcription factors,  
1387 activated; R: target of mating-type transcription factors, repressed; 0: CDS not controlled by  
1388 neither FPR1 nor FMR1. <sup>d</sup> = the corresponding gene was previously deleted [48].

1389 **S6 Table.** List of CDS encoding transcription factors found down-regulated in the  $\Delta PaRid$   
1390 micro-perithecia. A = ascospores, P = perithecia. <sup>d</sup> = the corresponding gene was previously  
1391 deleted [48].

**Figure 1. Structure and Phylogenetic analysis of DNA methyltransferases proteins.**

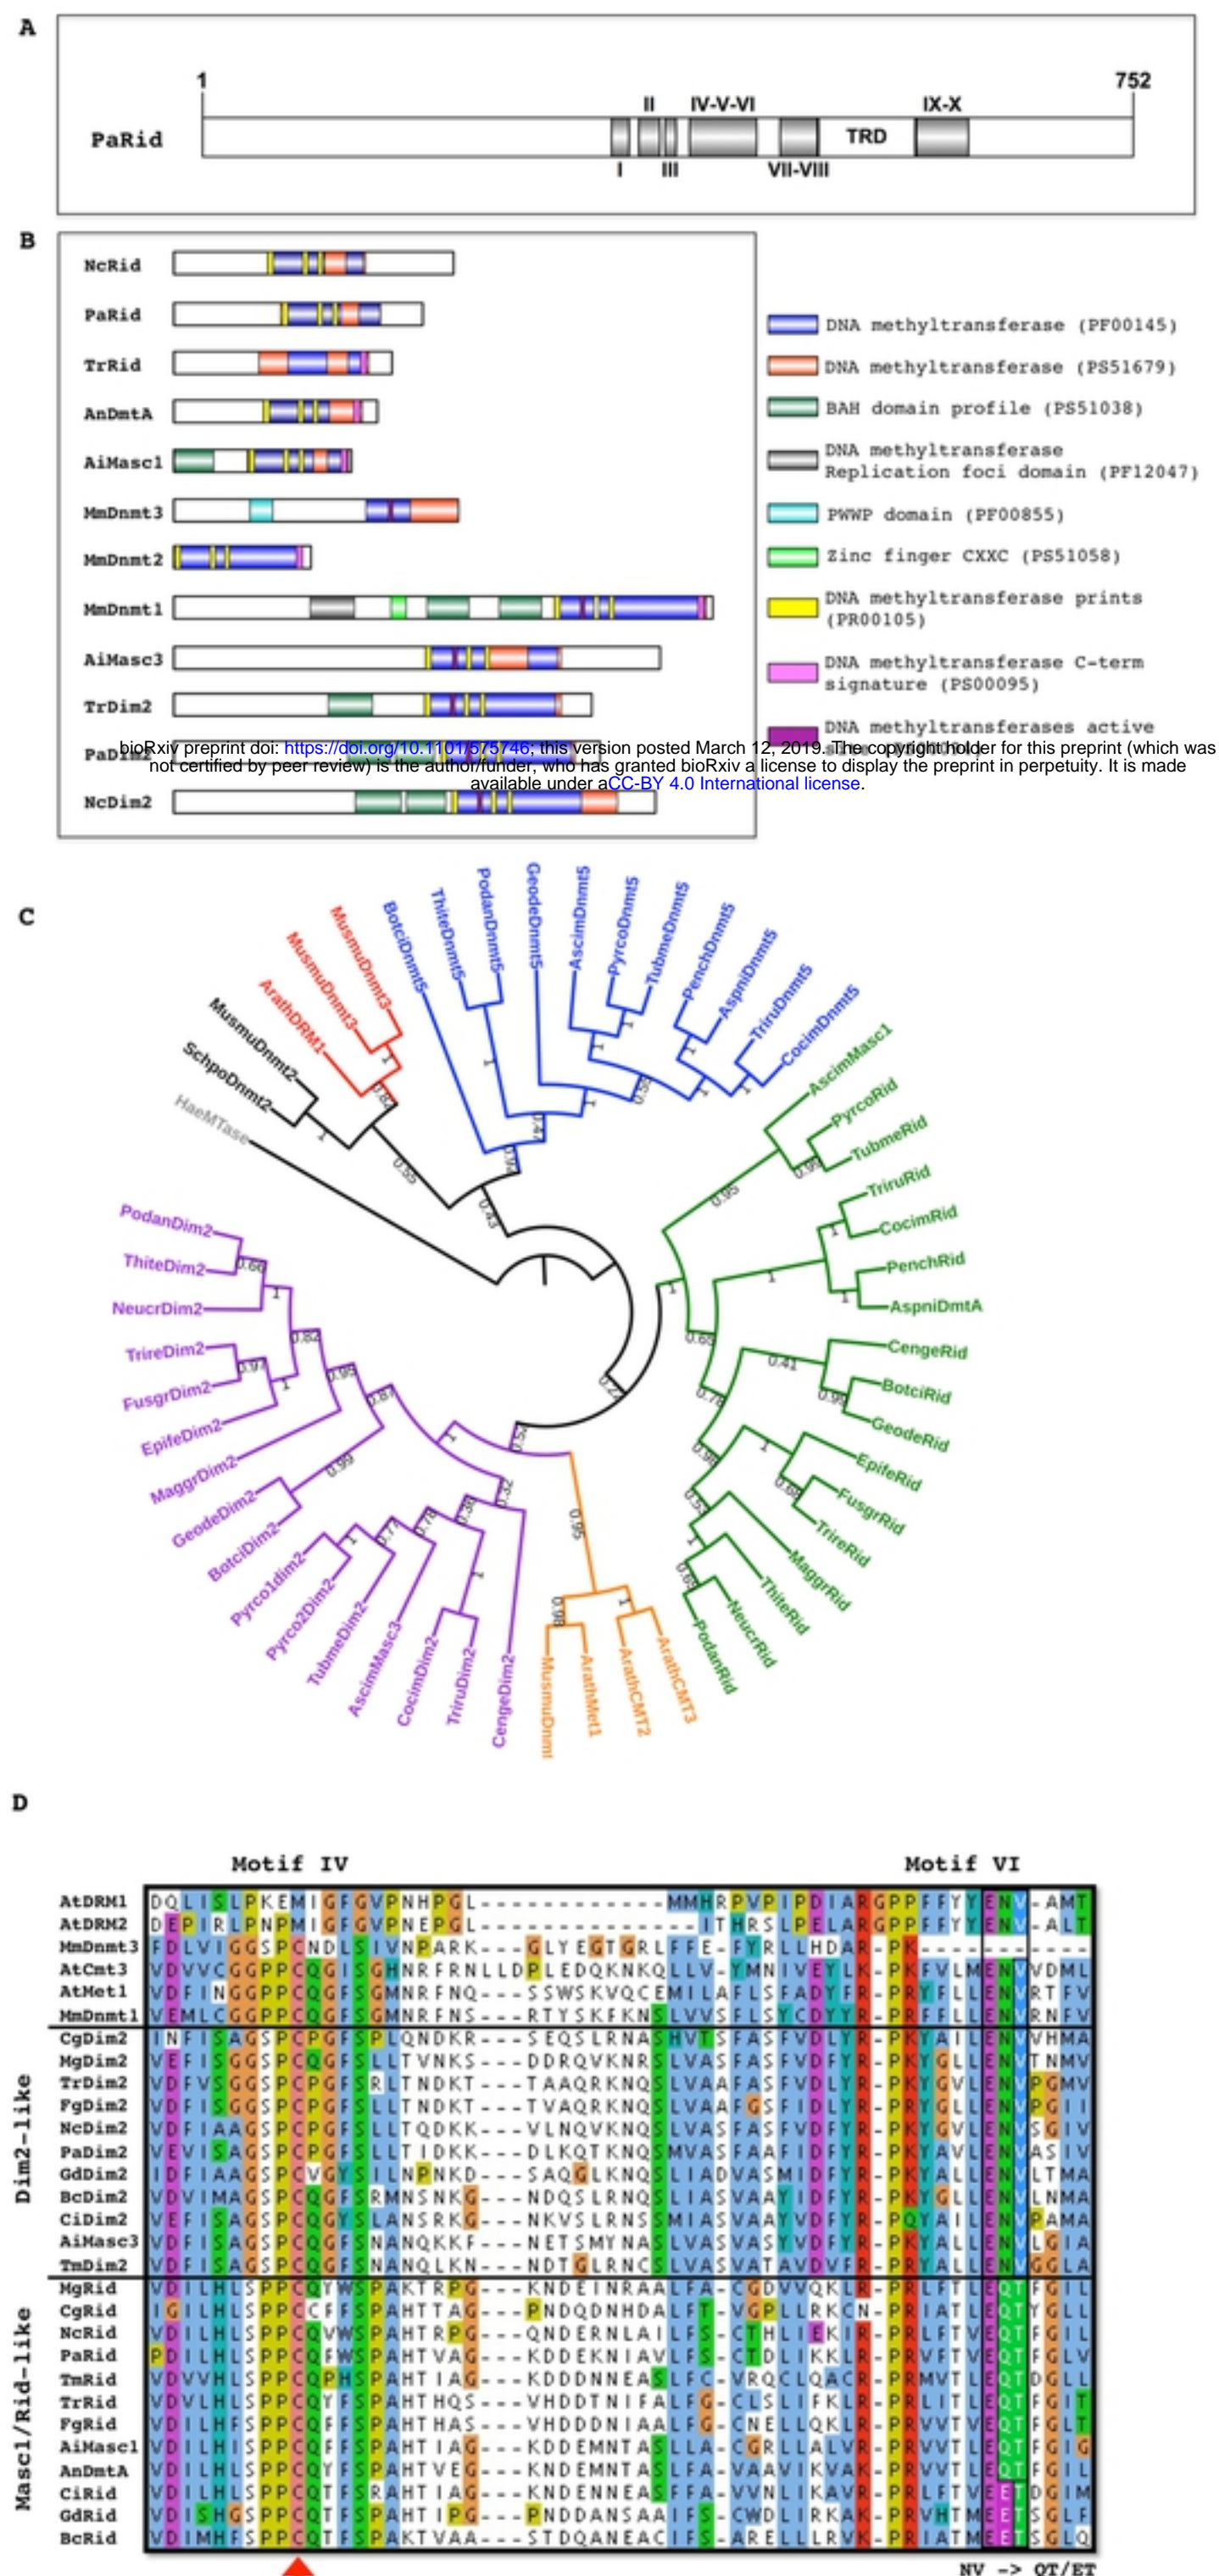



# Figure 2. PaRid is essential to complete fruiting body development and to produce ascospores.

bioRxiv preprint doi: <https://doi.org/10.1101/575746>; this version posted March 12, 2019. The copyright holder for this preprint (which was not certified by peer review) is the author/funder, who has granted bioRxiv a license to display the preprint in perpetuity. It is made available under aCC-BY 4.0 International license.

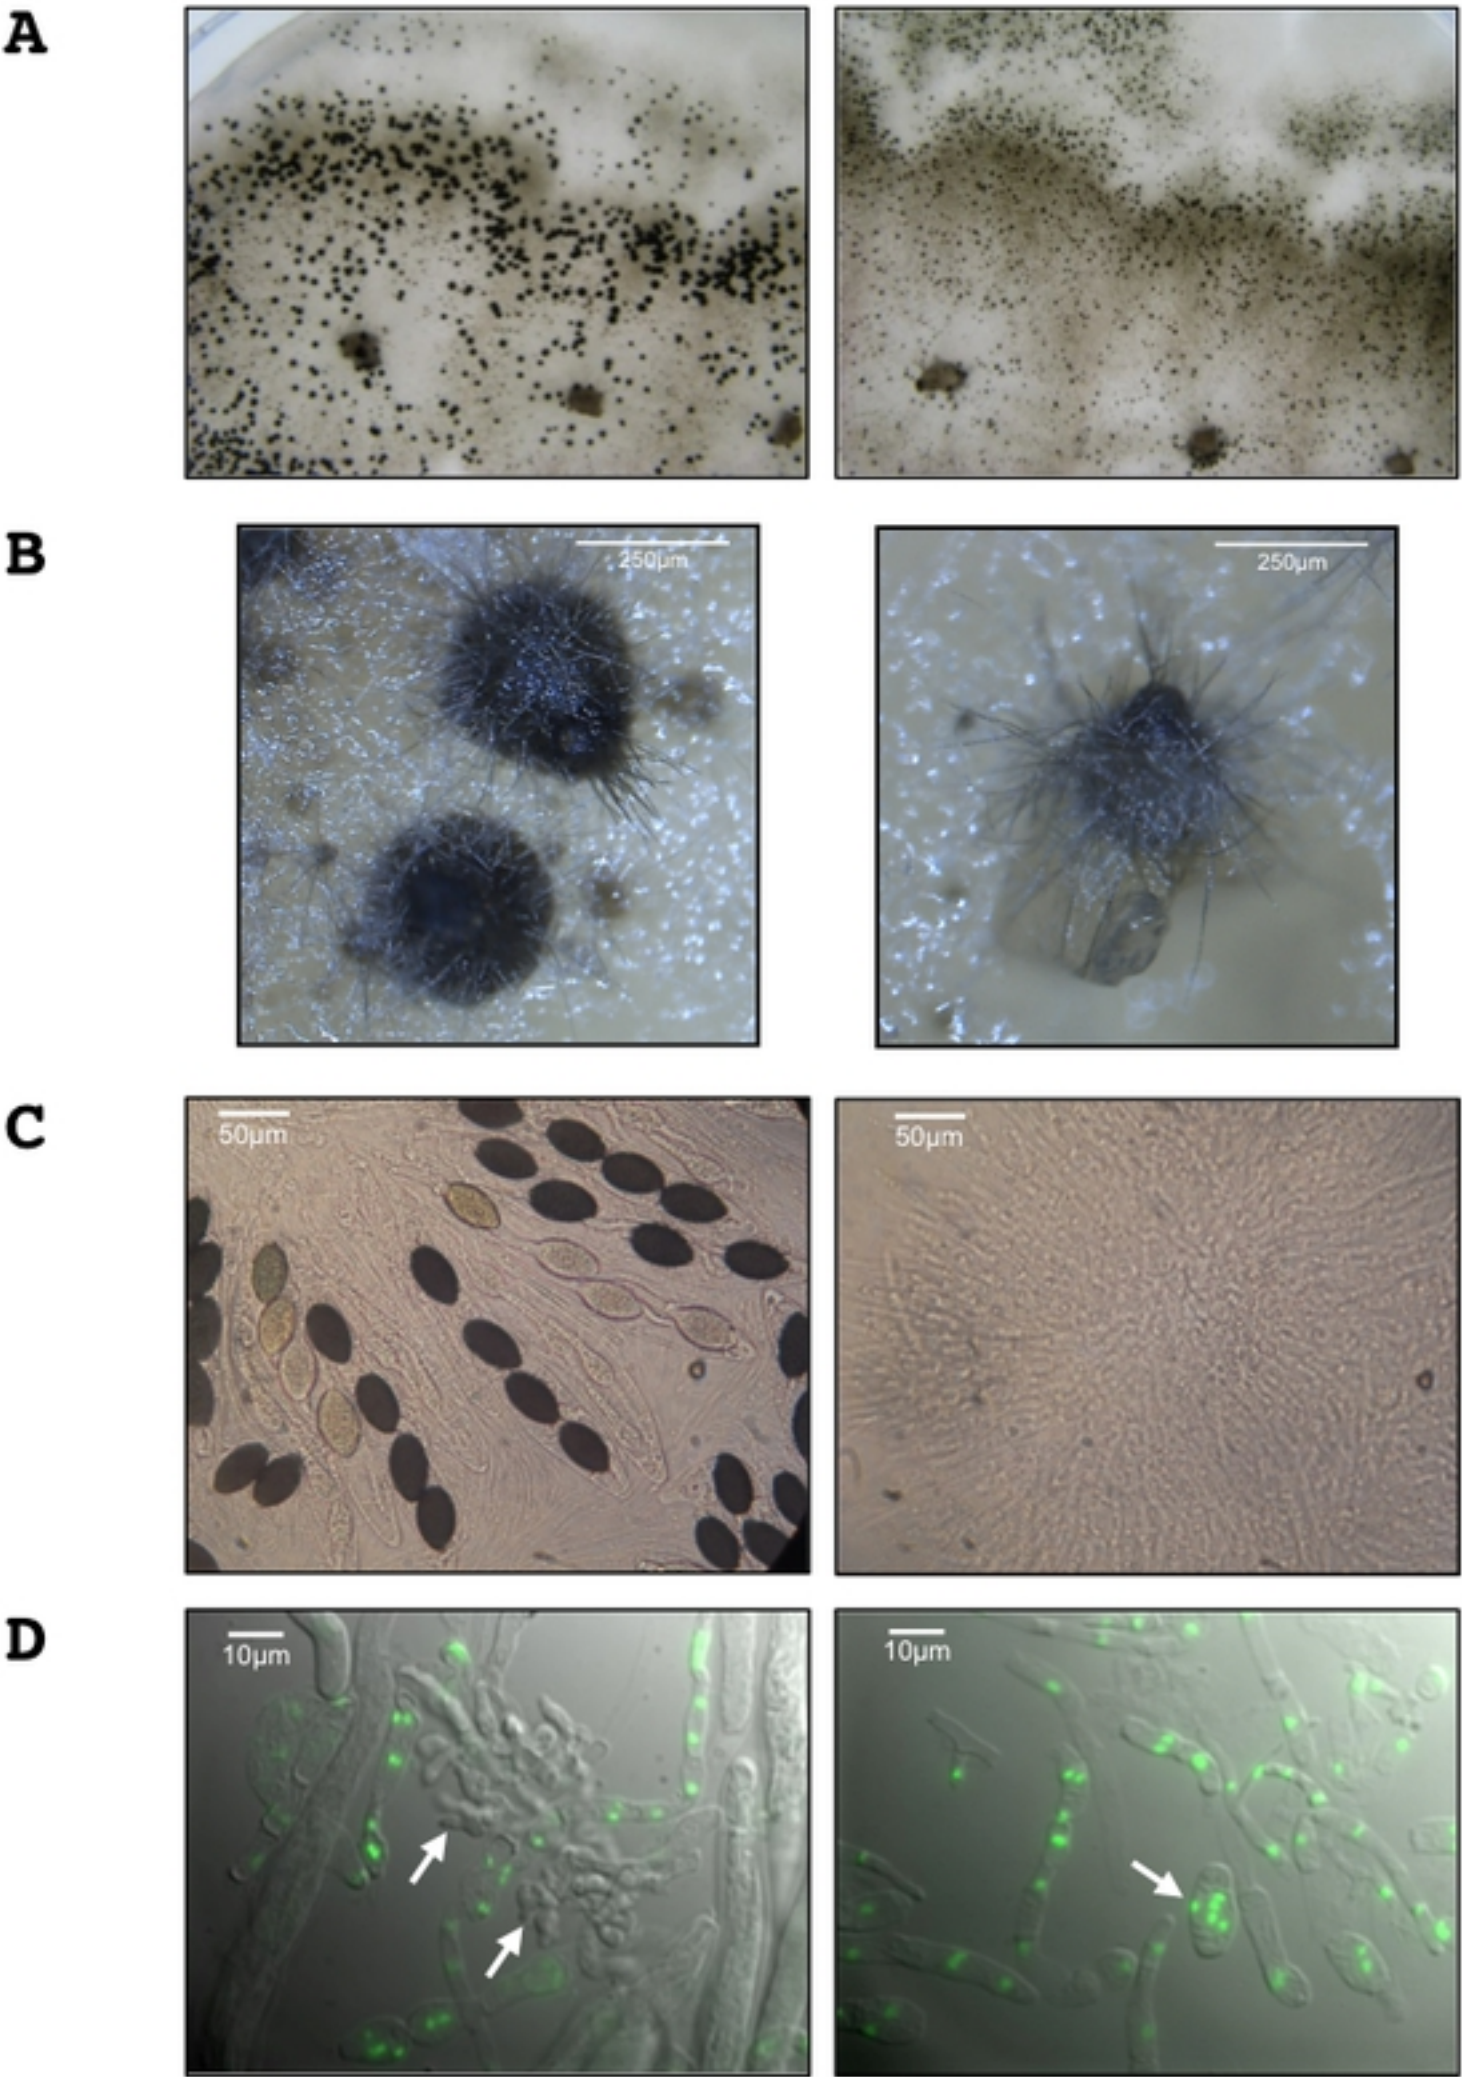



# Figure 3: Expression and subcellular localization of PaRid during *P. anserina* life cycle.

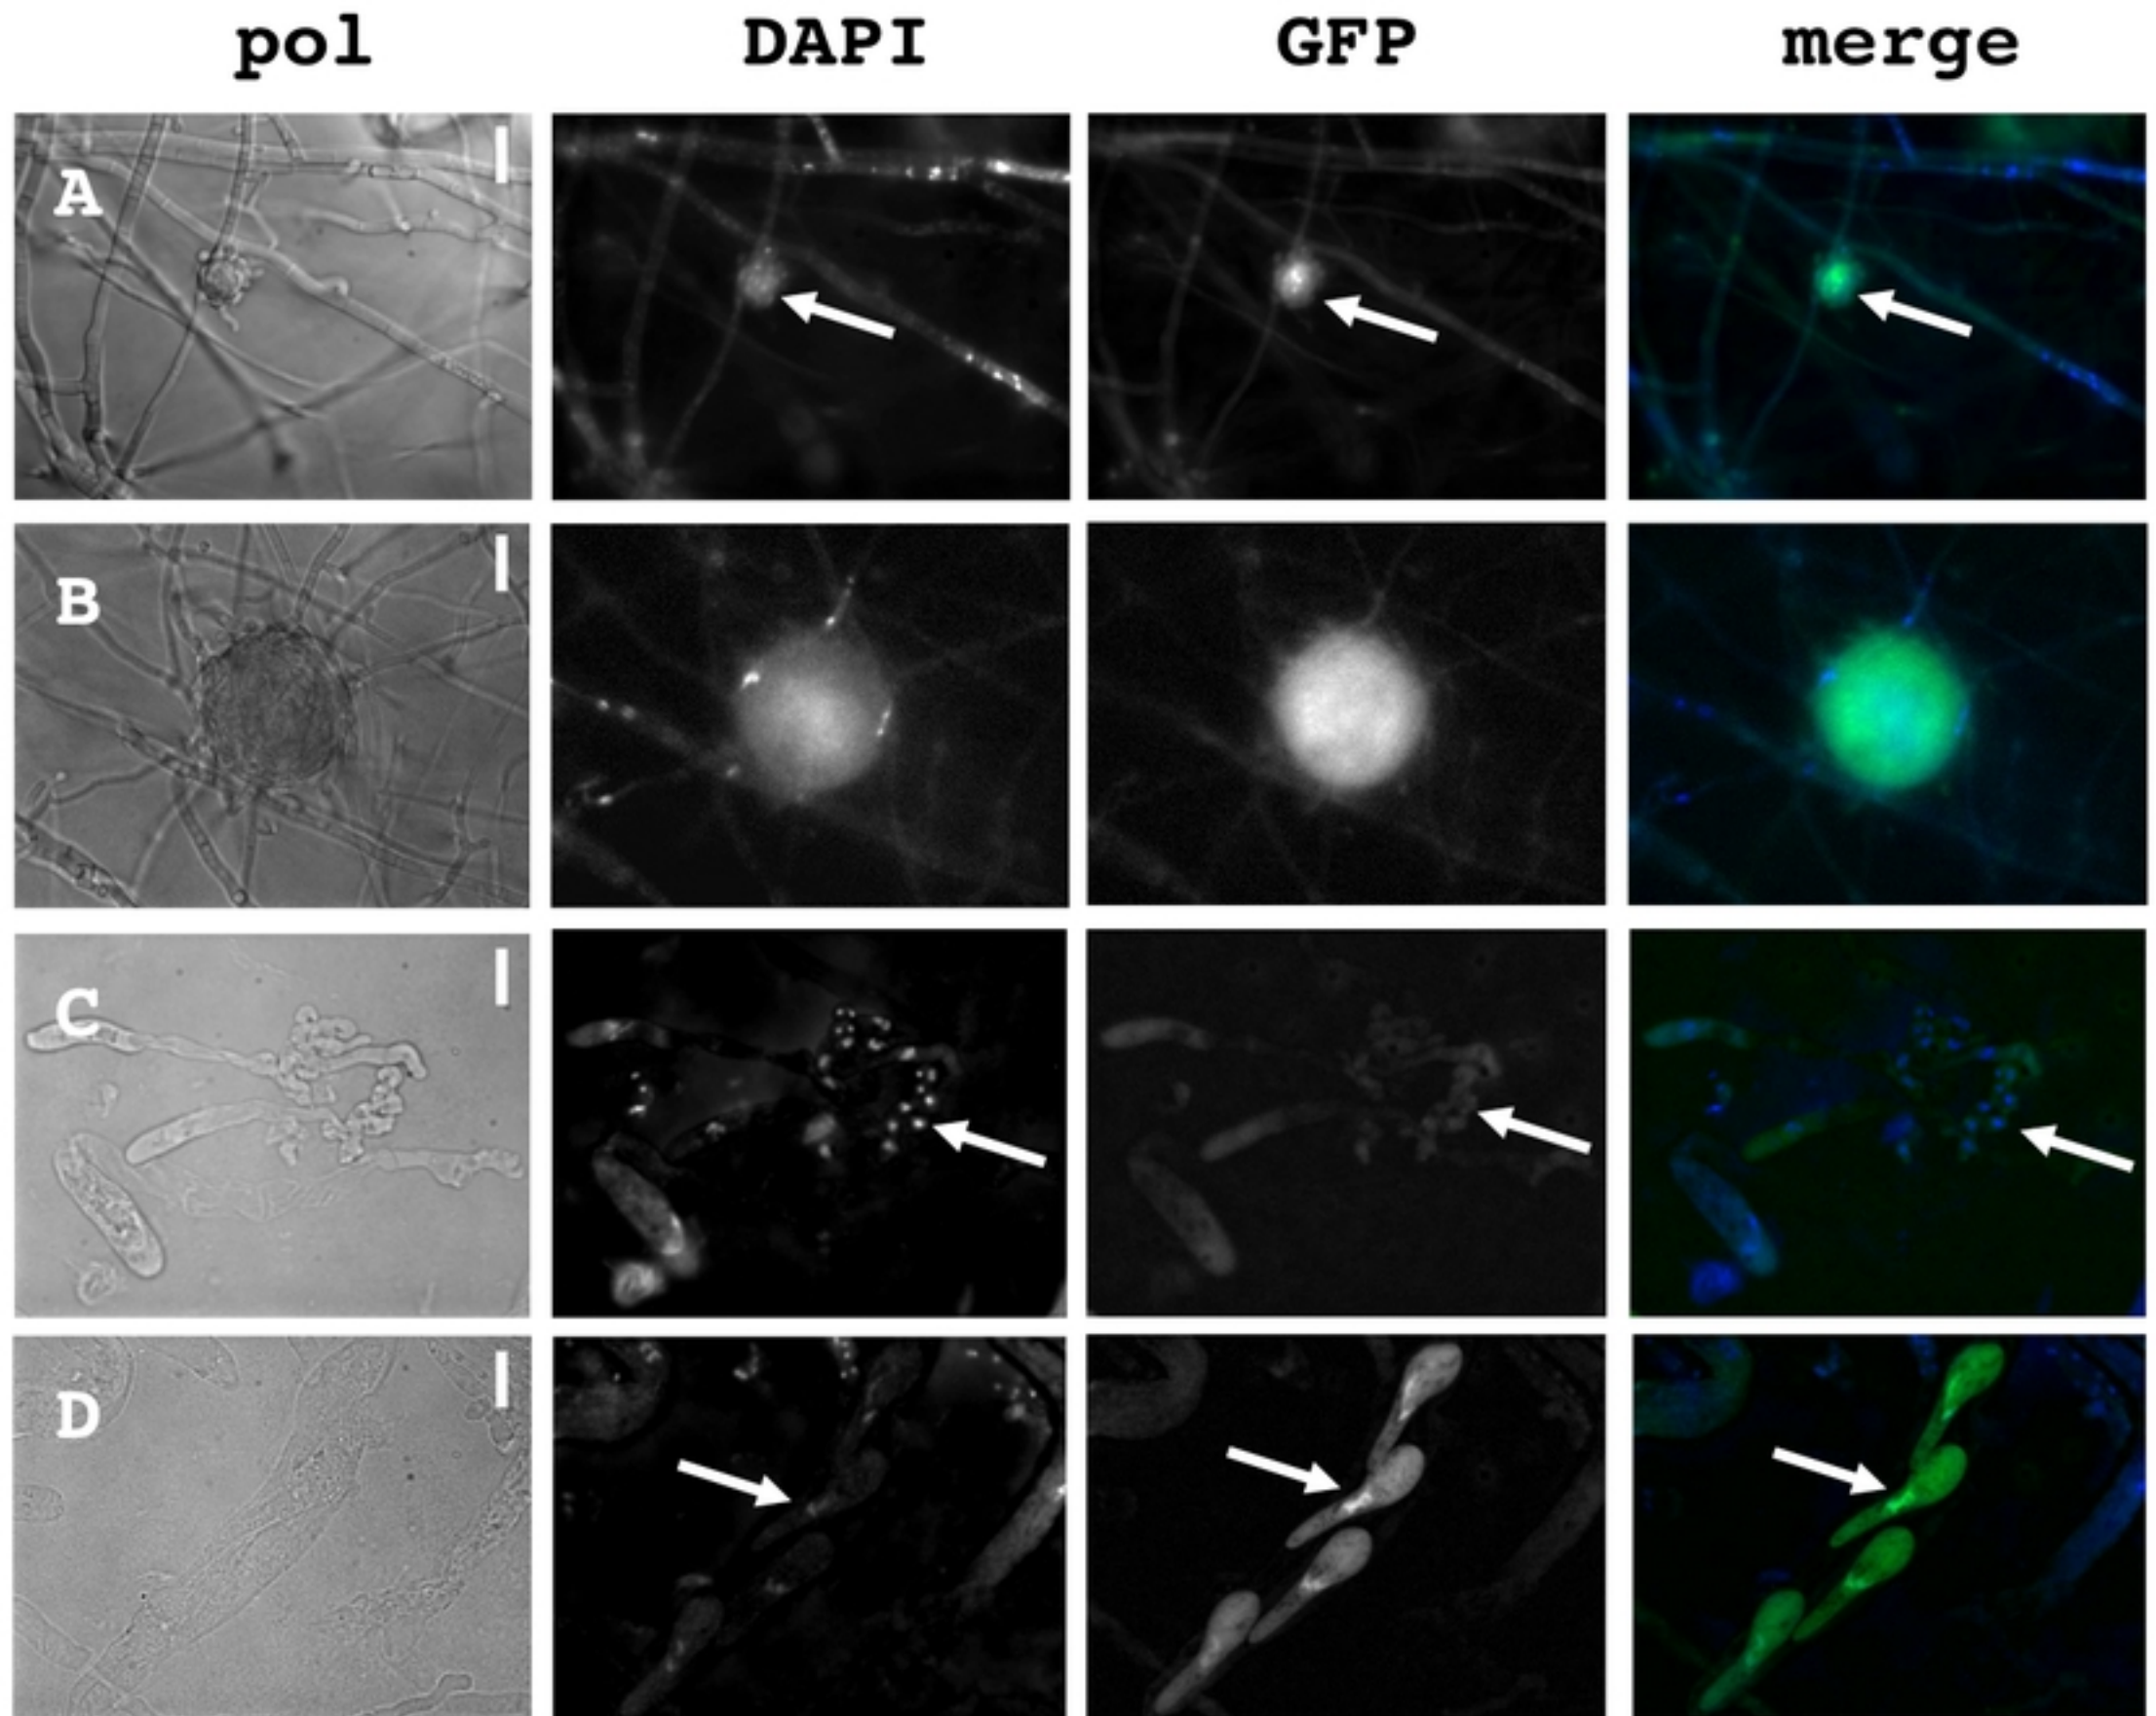

Figure 4: Transcriptomic analysis experimental design and data.

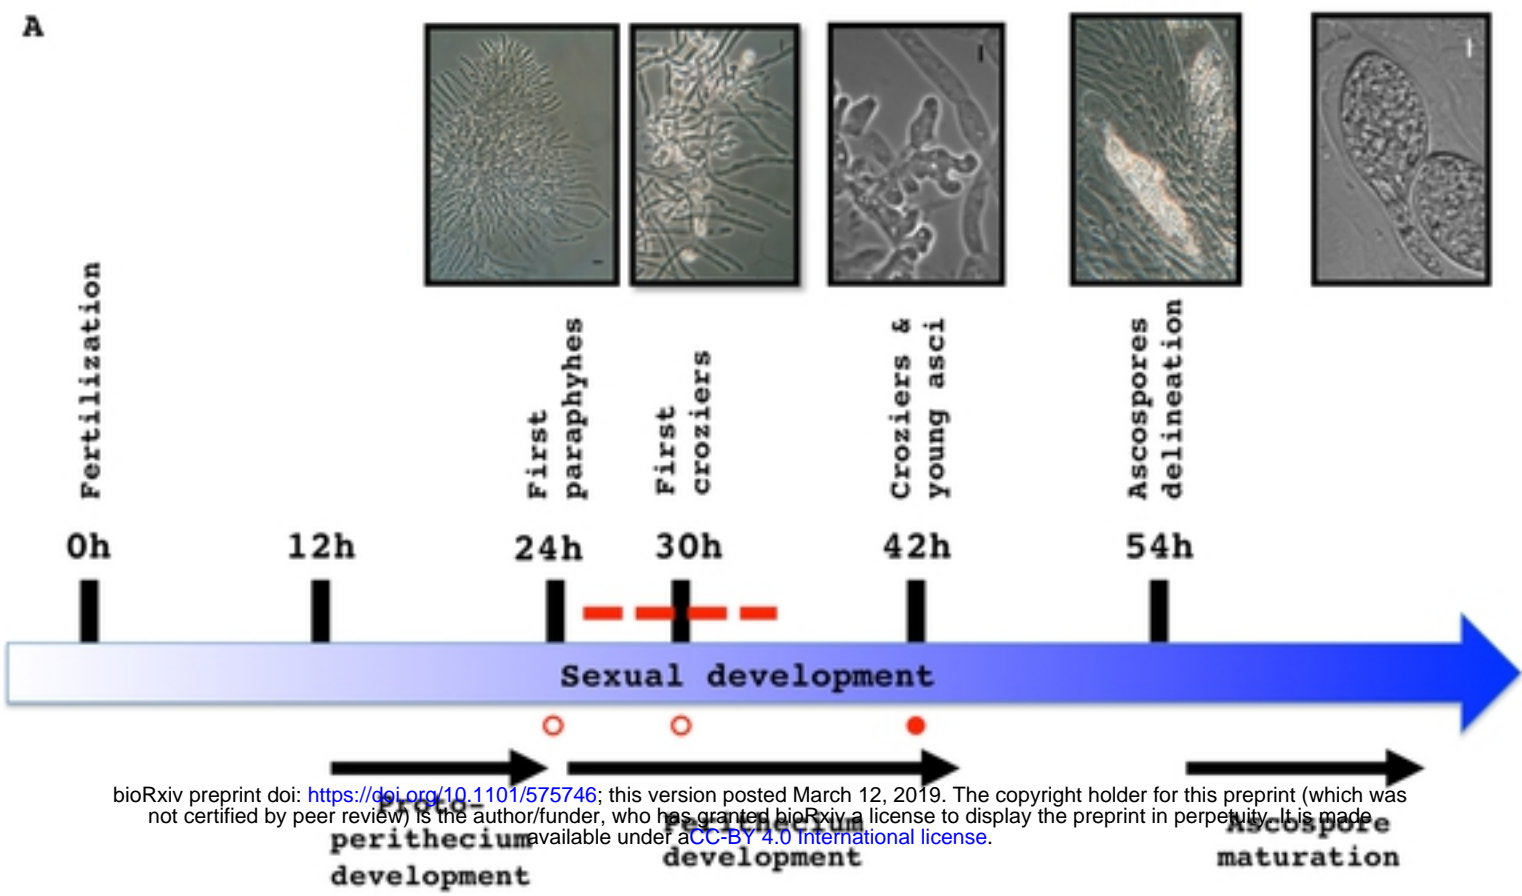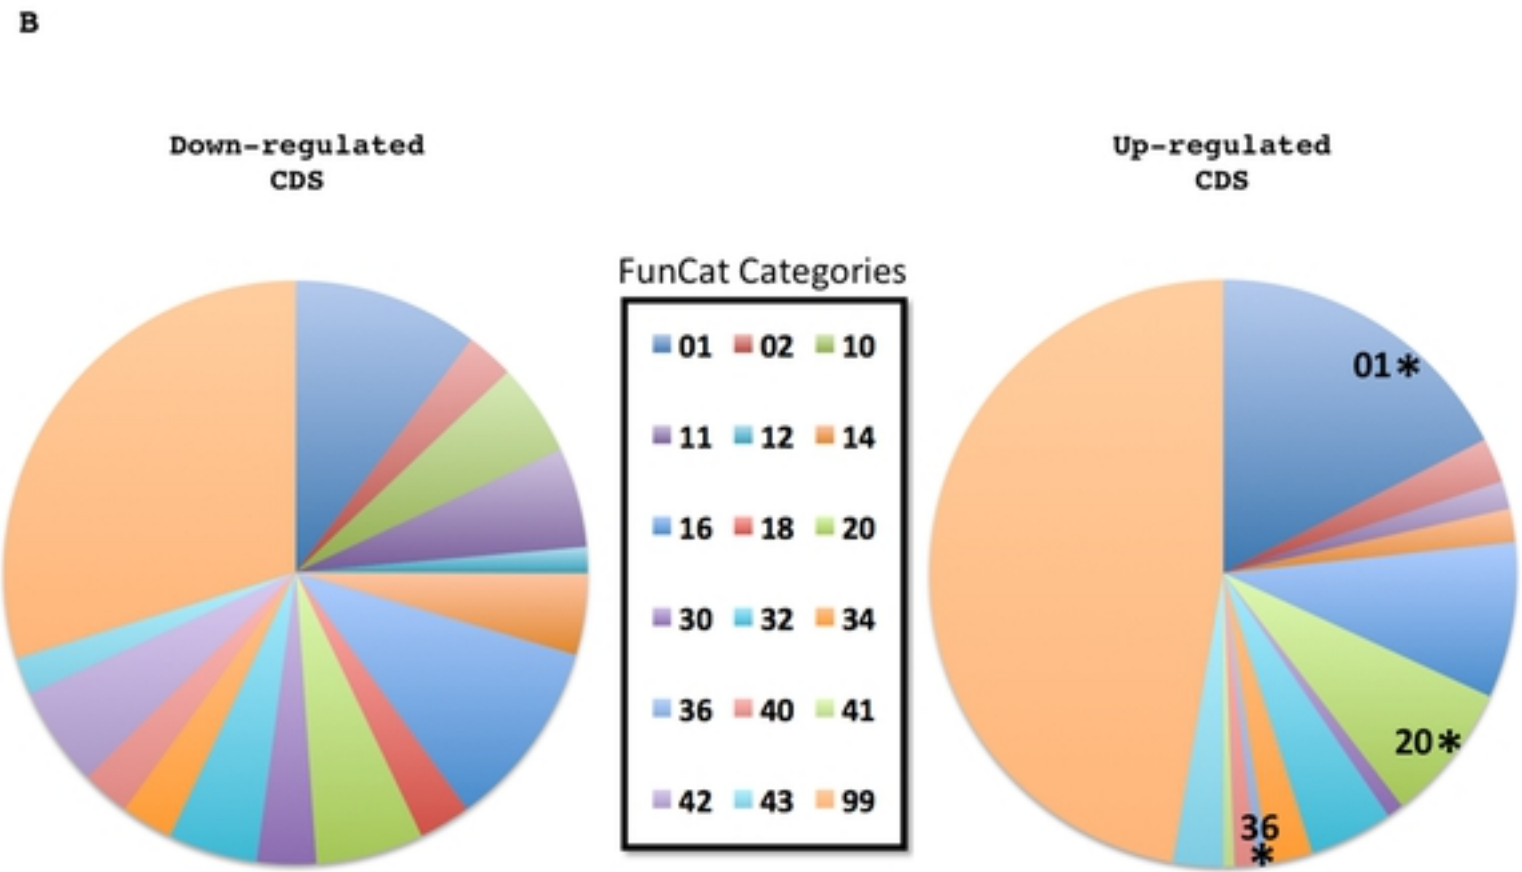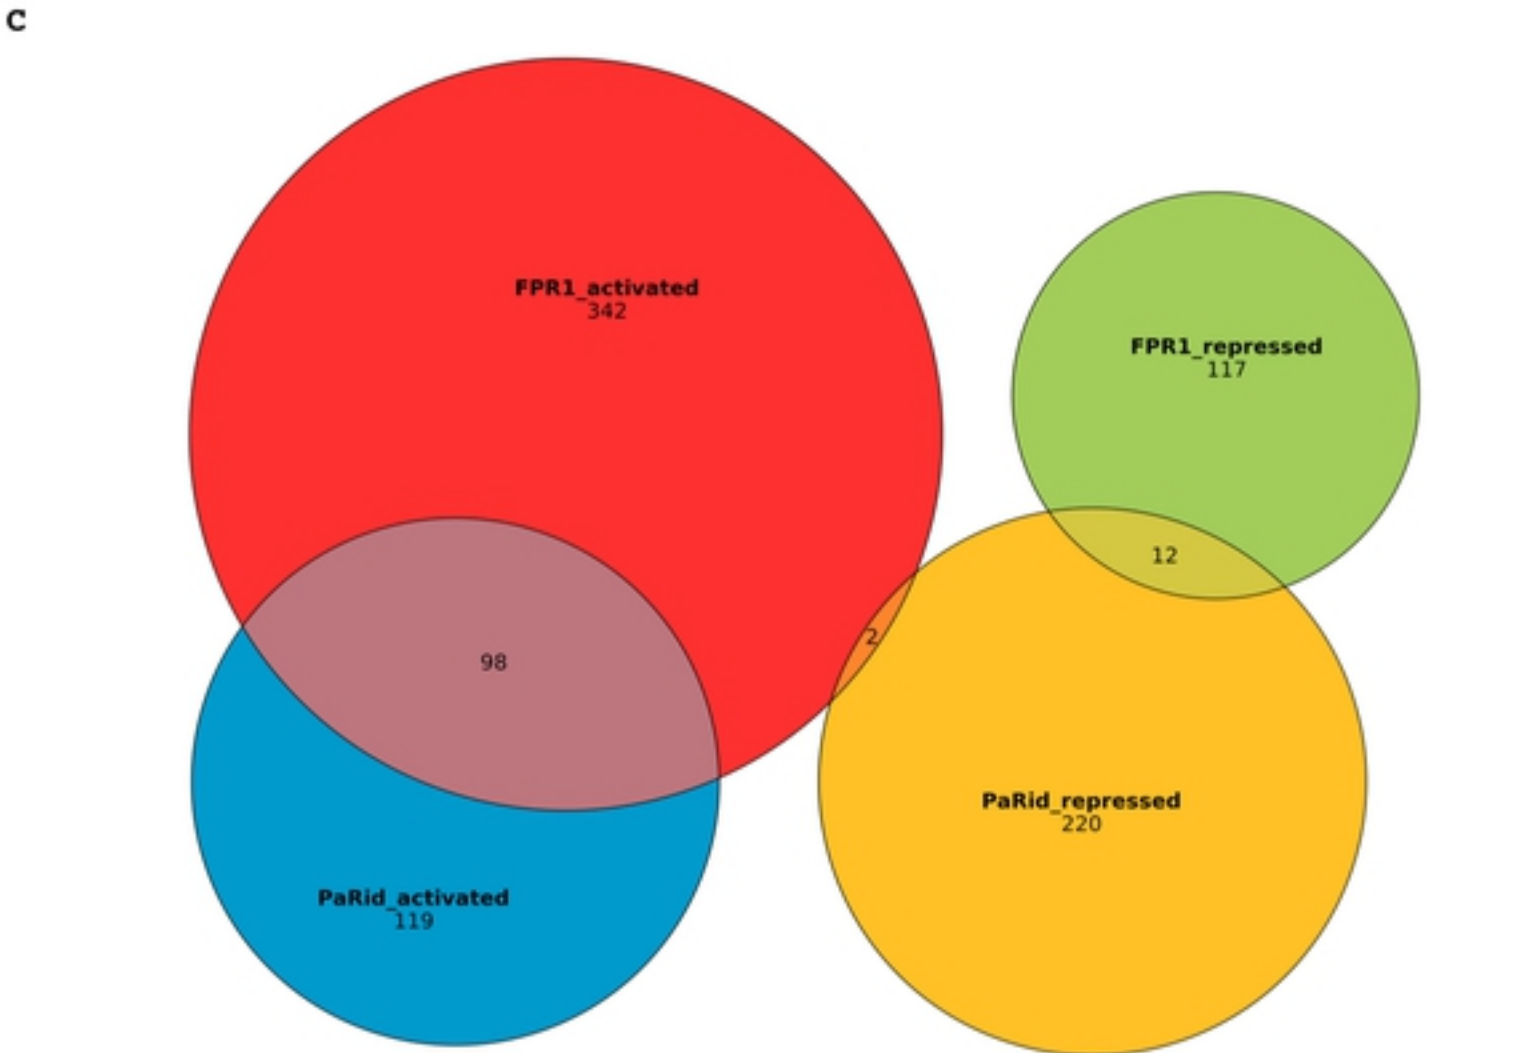

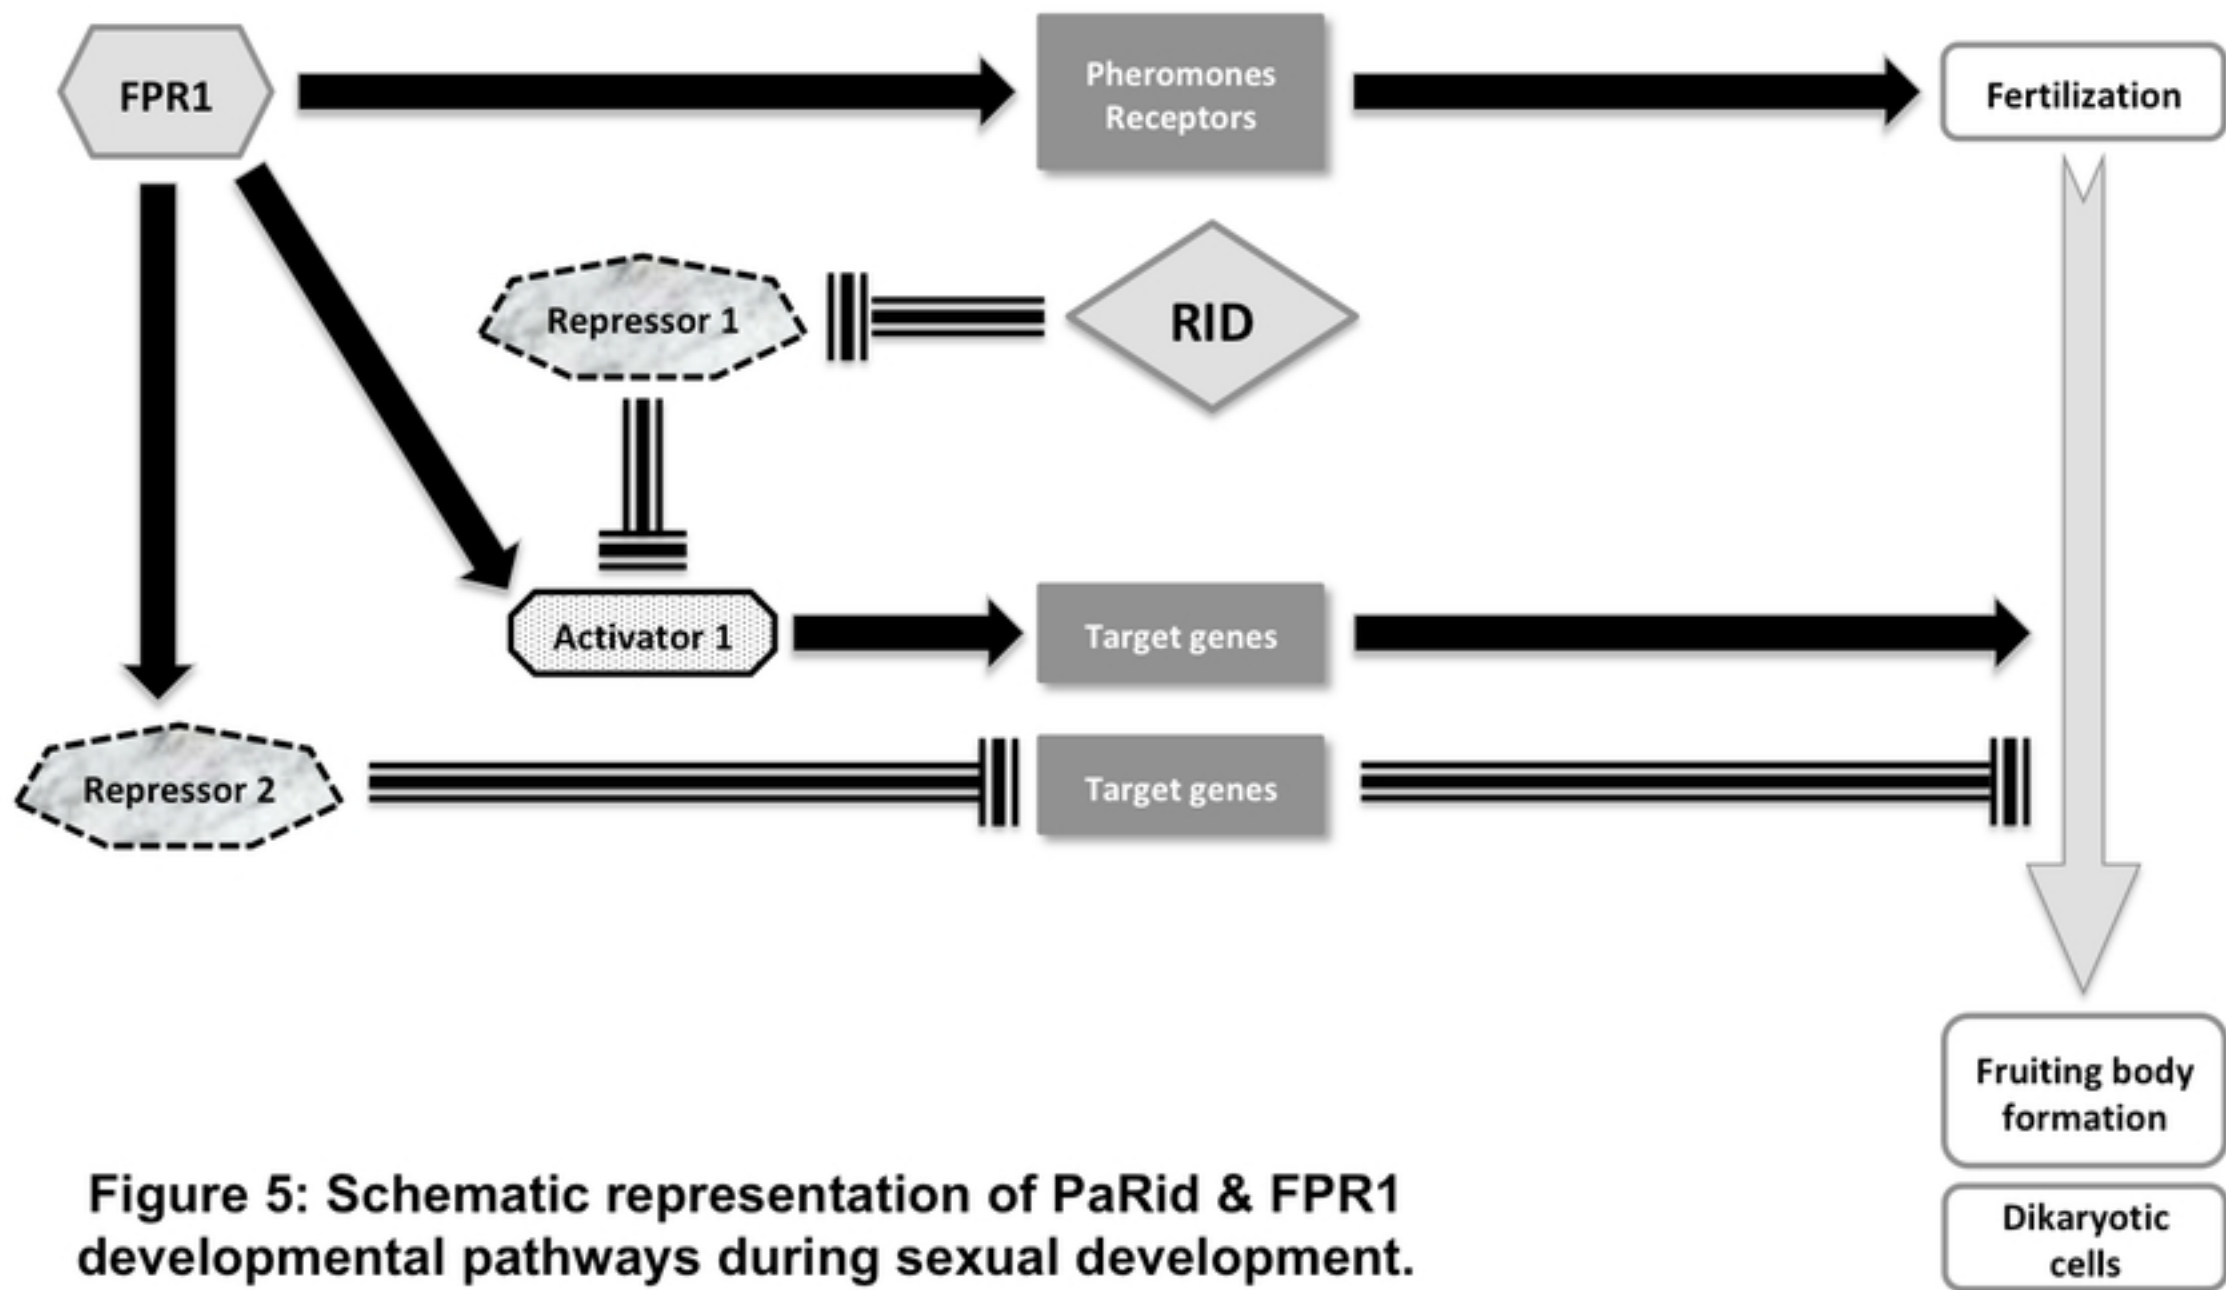

Source: http://biorxiv.org/content/10.1101/575746v1.full.pdf
